# Supplementary material for: Development of a Compendium of Energy Expenditures for Youth.
Source: Springer Nature journal article supplement (doi:10.1186/1479-5868-5-45), 2008-01-01
Supplement: 12966_2008_189_MOESM1_ESM.pdf [file 12966_2008_189_MOESM1_ESM.pdf]

The Compendium of Energy Expenditures for Youth  
(energy cost values derived from child measures are in bold)

| Code             | Activity                                          | MET                    | Rationale for energy cost                                                 | Reference                |
|------------------|---------------------------------------------------|------------------------|---------------------------------------------------------------------------|--------------------------|
| <b>SEDENTARY</b> |                                                   |                        |                                                                           |                          |
| <b>112020</b>    | <b>listening to music/radio – lying</b>           | <b>1.2<sup>a</sup></b> | lying awake measured in 5 child studies, n = 130                          | [21-25]                  |
| <b>122160</b>    | <b>listening to music/radio – sitting</b>         | <b>1.3</b>             | listening to radio, sitting measured in 1 child study, n = 22             | [20]                     |
| <b>110150</b>    | <b>lying awake</b>                                | <b>1.2</b>             | lying awake measured in 5 child studies, n = 130                          | [21-25]                  |
| <b>113040</b>    | <b>reading - lying down</b>                       | <b>1.2<sup>a</sup></b> | lying awake measured in 5 child studies, n = 130                          | [21-25]                  |
| 123110           | reading - sitting                                 | 1.3 <sup>a</sup>       | Ainsworth 09030 - sitting - reading book, newspaper, etc                  | [3]                      |
| <b>114190</b>    | <b>sending text messages (SMS) - lying down</b>   | <b>1.2<sup>a</sup></b> | lying awake measured in 5 child studies, n = 130                          | [21-25]                  |
| <b>124170</b>    | <b>sending text messages (SMS) – sitting</b>      | <b>1.5</b>             | sitting playing game on a mobile phone measured in 1 child study, n = 19. | [26]                     |
| 134180           | sending text messages (SMS) - standing            | 1.8                    | Ainsworth 09050 - standing talking or talking on the phone                | [3]                      |
| 124090           | sitting - talking                                 | 1.5                    | Ainsworth 09055 - sitting talking, or talking on the phone                | [3]                      |
| <b>121130</b>    | <b>sitting at the movies/cinema/theatre</b>       | <b>1.2<sup>a</sup></b> | sitting watching TV measured in 5 child studies, n = 470                  | [8, 33-36]               |
| <b>120140</b>    | <b>sitting quietly</b>                            | <b>1.4</b>             | sitting quietly measured in 9 child studies, n = 288                      | [19, 21, 22, 25, 27-31]  |
| 100010           | sleeping                                          | 0.9                    | Ainsworth 07030 - sleeping                                                | [3]                      |
| 134120           | standing - talking                                | 1.8                    | Ainsworth 09050 - standing talking or talking on the phone                | [3]                      |
| <b>130060</b>    | <b>standing quietly - e.g. standing in a line</b> | <b>1.5</b>             | standing quietly measured in 6 child studies, n = 211                     | [19, 21, 22, 25, 27, 32] |

|                                                 |                        |                                                                                                                                                                                                                                                      |                         |
|-------------------------------------------------|------------------------|------------------------------------------------------------------------------------------------------------------------------------------------------------------------------------------------------------------------------------------------------|-------------------------|
| <b>114070 talking on phone - lying down</b>     | <b>1.2<sup>a</sup></b> | lying awake measured in 5 child studies, n = 130                                                                                                                                                                                                     | [21-25]                 |
| 124100 talking on phone - sitting               | 1.5                    | Ainsworth 09055 - sitting talking, or talking on the phone                                                                                                                                                                                           | [3]                     |
| 134170 talking on phone - standing              | 1.8                    | Ainsworth 09050 - standing talking or talking on the phone                                                                                                                                                                                           | [3]                     |
| <b>111030 watching TV - lying quietly</b>       | <b>1.1</b>             | watching TV lying down measured in 1 child study, n = 31                                                                                                                                                                                             | [24]                    |
| <b>121050 watching TV – sitting</b>             | <b>1.2</b>             | sitting watching TV measured in 5 child studies, n = 470                                                                                                                                                                                             | [8, 33-36]              |
| <b>115080 writing - lying down</b>              | <b>1.2<sup>a</sup></b> | lying awake measured in 5 child studies, n = 130                                                                                                                                                                                                     | [21-25]                 |
| <b>TRANSPORT</b>                                |                        |                                                                                                                                                                                                                                                      |                         |
| <b>240070 climbing stairs</b>                   |                        |                                                                                                                                                                                                                                                      |                         |
| <b>240071 climbing stairs - light effort</b>    | <b>5.3</b>             | climbing stairs measured in 2 child studies, n = 224                                                                                                                                                                                                 | [8, 35]                 |
| <b>240072 climbing stairs - moderate effort</b> | <b>7.0</b>             | climbing stairs measured in 2 child studies, n = 224                                                                                                                                                                                                 | [8, 35]                 |
| <b>240073 climbing stairs - hard effort</b>     | <b>8.8</b>             | climbing stairs measured in 2 child studies, n = 224                                                                                                                                                                                                 | [8, 35]                 |
| 241090 riding a motorcycle or motor scooter     | 2.5                    | Ainsworth 16030 - motor scooter, motorcycle                                                                                                                                                                                                          | [3]                     |
| <b>221120 riding in a bus</b>                   | <b>1.4<sup>a</sup></b> | sitting quietly measured in 9 child studies, n = 288                                                                                                                                                                                                 | [19, 21, 22, 25, 27-31] |
| <b>221130 riding in a plane</b>                 | <b>1.4<sup>a</sup></b> | sitting quietly measured in 9 child studies, n = 288                                                                                                                                                                                                 | [19, 21, 22, 25, 27-31] |
| <b>221110 riding in a train/tram/ferry</b>      | <b>1.4<sup>a</sup></b> | sitting quietly measured in 9 child studies, n = 288                                                                                                                                                                                                 | [19, 21, 22, 25, 27-31] |
| <b>221000 riding in/driving a car</b>           | <b>1.4<sup>a</sup></b> | sitting quietly measured in 9 child studies, n = 288                                                                                                                                                                                                 | [19, 21, 22, 25, 27-31] |
| <b>240050 walking</b>                           |                        |                                                                                                                                                                                                                                                      |                         |
| <b>240051 walking - light effort</b>            | <b>2.9<sup>b</sup></b> | regression equation developed by Ridley and Olds:<br>METs = 0.07 age – 1.21 speed (m.s <sup>-1</sup> ) + 1.65 speed <sup>2</sup> (m.s <sup>-1</sup> ) + 1.72, r = 0.65, SEE = 1.0 MET, n = 1187<br>Light speed <sup>c</sup> = 0.97 m.s <sup>-1</sup> | [9]                     |

---

|                                                                            |                        |                                                                       |      |
|----------------------------------------------------------------------------|------------------------|-----------------------------------------------------------------------|------|
| <b>240052 walking - moderate effort</b>                                    | <b>3.6<sup>b</sup></b> | As above<br>Moderate speed <sup>c</sup> = 1.25 m.s <sup>-1</sup>      | [9]  |
| <b>240053 walking - hard effort</b>                                        | <b>4.6<sup>b</sup></b> | As above<br>Hard speed <sup>c</sup> = 1.53 m.s <sup>-1</sup>          | [9]  |
| <b>240090 walking carrying a load</b>                                      |                        |                                                                       |      |
| <b>240091 walking carrying a load - light effort</b>                       | <b>3.4</b>             | 0.75 × moderate value                                                 |      |
| <b>240092 walking carrying a load - moderate effort</b>                    | <b>4.2</b>             | walking carrying an 8.5 kg backpack measured in 1 child study, n = 35 | [32] |
| <b>240093 walking carrying a load - hard effort</b>                        | <b>5.3</b>             | 1.25 × moderate value                                                 |      |
| 241080 walking using crutches                                              | 4.0                    | Ainsworth 17140 - walking using crutches                              | [3]  |
| <b>PLAY/SPORT</b>                                                          |                        |                                                                       |      |
| 341750 aerobics/health hustle                                              |                        |                                                                       |      |
| 341751 aerobics/health hustle - light effort                               | 5.0                    | Ainsworth 03020 - aerobic, low impact                                 | [3]  |
| <b>341752 aerobics/health hustle - moderate effort</b>                     | <b>6.2</b>             | aerobics (step) measured in 1 child study, n = 74                     | [35] |
| 341753 aerobics/health hustle - hard effort                                | 8.5                    | Ainsworth 03016 - aerobic, step                                       | [3]  |
| 331000 archery                                                             | 3.5                    | Ainsworth 15010 - archery (non-hunting)                               | [3]  |
| 341660 athletics (track and field): hurdles steeplechase                   |                        |                                                                       |      |
| 341661 athletics (track and field): hurdles steeplechase - light effort    | 7.5                    | 0.75 × moderate value                                                 |      |
| 341662 athletics (track and field): hurdles steeplechase - moderate effort | 10.0                   | Ainsworth 15734 - track and field (steeplechase, hurdles)             | [3]  |
| 341663 athletics (track and field): hurdles steeplechase - hard effort     | 12.5                   | 1.25 × moderate value                                                 |      |
| 341650 athletics (track and field): jumping                                |                        |                                                                       |      |
| 341651 athletics (track and field): jumping - light effort                 | 4.5                    | 0.75 × moderate value                                                 |      |

---

---

|               |                                                            |             |                                                                                   |      |
|---------------|------------------------------------------------------------|-------------|-----------------------------------------------------------------------------------|------|
| 341652        | athletics (track and field):<br>jumping - moderate effort  | 6.0         | Ainsworth 15733 - track<br>and field (high, long,<br>triple jump)                 | [3]  |
| 341653        | athletics (track and field):<br>jumping - hard effort      | 7.5         | 1.25 × moderate value                                                             |      |
| 341670        | athletics (track and field):<br>throwing                   |             |                                                                                   |      |
| 341671        | athletics (track and field):<br>throwing - light effort    | 3.0         | 0.75 × moderate value                                                             |      |
| 341672        | athletics (track and field):<br>throwing - moderate effort | 4.0         | Ainsworth 15732 - track<br>and field (shot, discus,<br>hammer throw)              | [3]  |
| 341673        | athletics (track and field):<br>throwing - hard effort     | 5.0         | 1.25 × moderate value                                                             |      |
| 342010        | badminton                                                  |             |                                                                                   |      |
| 342011        | badminton - light effort                                   | 3.4         | 0.75 × moderate value                                                             |      |
| 342012        | badminton - moderate effort                                | 4.5         | Ainsworth 15030 -<br>badminton, general                                           | [3]  |
| 342013        | badminton - hard effort                                    | 5.6         | 1.25 × moderate value                                                             |      |
| <b>341790</b> | <b>ballet</b>                                              |             |                                                                                   |      |
| <b>341791</b> | <b>ballet - light effort</b>                               | <b>3.0</b>  | 0.75 × moderate value                                                             |      |
| <b>341792</b> | <b>ballet - moderate effort</b>                            | <b>4.8</b>  | dancing measured in<br>one child study, n = 36                                    | [27] |
| <b>341793</b> | <b>ballet - hard effort</b>                                | <b>7.0</b>  | 1.25 × moderate value                                                             |      |
| 342020        | baseball                                                   |             |                                                                                   |      |
| 342021        | baseball - light effort                                    | 3.8         | 0.75 × moderate value                                                             |      |
| 342022        | baseball - moderate effort                                 | 5.0         | Ainsworth 15620 -<br>baseball or softball,<br>general                             | [3]  |
| 342023        | baseball - hard effort                                     | 6.3         | 1.25 × moderate value                                                             |      |
| <b>342030</b> | <b>basketball</b>                                          |             |                                                                                   |      |
| <b>342031</b> | <b>basketball - light effort</b>                           | <b>7.2</b>  | shooting hoops<br>measured in 1 child<br>study, n = 74                            | [35] |
| <b>342032</b> | <b>basketball - moderate effort</b>                        | <b>8.2</b>  | basketball game<br>measured in 1 child<br>study, n = 12                           | [37] |
| <b>342033</b> | <b>basketball - hard effort</b>                            | <b>10.1</b> | basketball – fast dribbling<br>and shooting measured<br>in 1 child study, n = 19. | [26] |

---

---

|               |                                                |            |                                                             |      |  |
|---------------|------------------------------------------------|------------|-------------------------------------------------------------|------|--|
| 342050        | bobsled toboggan luge                          |            |                                                             |      |  |
| 342051        | bobsled toboggan luge - light effort           | 5.3        | 0.75 × moderate value                                       |      |  |
| 342052        | bobsled toboggan luge - moderate effort        | 7.0        | Ainsworth 19180 - sledding, tobogganing, bobsledding, luge  | [3]  |  |
| 342053        | bobsled toboggan luge - hard effort            | 8.8        | 1.25 × moderate value                                       |      |  |
| 342070        | broomball/floorball                            |            |                                                             |      |  |
| 342071        | broomball/floorball - light effort             | 5.3        | 0.75 × moderate value                                       |      |  |
| 342072        | broomball/floorball - moderate effort          | 7.0        | Ainsworth 15130 - broomball                                 | [3]  |  |
| 342073        | broomball/floorball - hard effort              | 8.8        | 1.25 × moderate value                                       |      |  |
| 341080        | calisthenics                                   |            |                                                             |      |  |
| 341081        | calisthenics - light effort                    | 3.5        | Ainsworth 02030 - calisthenics, light effort                | [3]  |  |
| 341082        | calisthenics - moderate effort                 | 5.8        | mean of light and hard values.                              |      |  |
| 341083        | calisthenics - hard effort                     | 8.0        | Ainsworth 02020 - calisthenics, vigorous effort             | [3]  |  |
| <b>342850</b> | <b>chasey/tag/tips/tiggy</b>                   |            |                                                             |      |  |
| <b>342851</b> | <b>chasey/tag/tips/tiggy - light effort</b>    | <b>3.8</b> | 0.75 × moderate value                                       |      |  |
| <b>342852</b> | <b>chasey/tag/tips/tiggy - moderate effort</b> | <b>5.0</b> | playground games measured in 1 child study, n = 37          | [27] |  |
| <b>342853</b> | <b>chasey/tag/tips/tiggy - hard effort</b>     | <b>6.3</b> | 1.25 × moderate value                                       |      |  |
| 341840        | climbing trees                                 | 8.0        | movement pattern similar to rock climbing - Ainsworth 17120 | [3]  |  |
| <b>342100</b> | <b>cricket</b>                                 |            |                                                             |      |  |
| <b>342101</b> | <b>cricket - light effort</b>                  | <b>2.6</b> | 0.75 × moderate value                                       |      |  |
| <b>342102</b> | <b>cricket - moderate effort</b>               | <b>3.5</b> | cricket measured in 1 child study, n = 35                   | [27] |  |
| <b>342103</b> | <b>cricket - hard effort</b>                   | <b>4.4</b> | 1.25 × moderate value                                       |      |  |
| 341110        | croquet                                        | 2.5        | Ainsworth 15160                                             | [3]  |  |
| 342120        | curling                                        |            |                                                             |      |  |

---

---

|                                                        |                                                                   |                        |                                                                      |      |
|--------------------------------------------------------|-------------------------------------------------------------------|------------------------|----------------------------------------------------------------------|------|
| 342121                                                 | curling - light effort                                            | 3.0                    | 0.75 × moderate value                                                |      |
| 342122                                                 | curling - moderate effort                                         | 4.0                    | Ainsworth 15170 - curling                                            | [3]  |
| 342123                                                 | curling - hard effort                                             | 5.0                    | 1.25 × moderate value                                                |      |
| <b>341130 dancing (general)</b>                        |                                                                   |                        |                                                                      |      |
| <b>341131</b>                                          | <b>dancing (general) - light effort</b>                           | <b>4.1</b>             | 0.75 × moderate value                                                |      |
| <b>341132</b>                                          | <b>dancing (general) - moderate effort</b>                        | <b>5.5</b>             | dancing measured in one child study, n = 36                          | [27] |
| <b>341133</b>                                          | <b>dancing (general) - hard effort</b>                            | <b>6.9</b>             | 1.25 × moderate value                                                |      |
| <b>342910 dodge ball/poison ball/brandy/speed ball</b> |                                                                   |                        |                                                                      |      |
| <b>342911</b>                                          | <b>dodge ball/poison ball/brandy/speed ball - light effort</b>    | <b>3.8</b>             | 0.75 × moderate value                                                |      |
| <b>342912</b>                                          | <b>dodge ball/poison ball/brandy/speed ball - moderate effort</b> | <b>5.0</b>             | playground games measured in 1 child study, n = 37                   | [27] |
| <b>342913</b>                                          | <b>dodge ball/poison ball/brandy/speed ball - hard effort</b>     | <b>6.3</b>             | 1.25 × moderate value                                                |      |
| 342250                                                 | European handball (team)                                          |                        |                                                                      |      |
| 342251                                                 | European handball (team) - light effort                           | 6.0                    | 0.75 × moderate value                                                |      |
| 342252                                                 | European handball (team) - moderate effort                        | 8.0                    | Ainsworth 15330 - handball, team                                     | [3]  |
| 342253                                                 | European handball (team) - hard effort                            | 10.0                   | 1.25 × moderate value                                                |      |
| 321870                                                 | fishing                                                           | 3.0                    | Ainsworth 04040 - fishing, general                                   | [3]  |
| <b>342150 football (Australian/American)</b>           |                                                                   |                        |                                                                      |      |
| <b>342151</b>                                          | <b>football (Australian/American) - light effort</b>              | <b>6.6</b>             | 0.75 × moderate value                                                |      |
| <b>342152</b>                                          | <b>football (Australian/American) - moderate effort</b>           | <b>8.8<sup>a</sup></b> | movement pattern similar to soccer measured in 1 child study, n = 25 | [27] |
| <b>342153</b>                                          | <b>football (Australian/American) - hard effort</b>               | <b>11.0</b>            | 1.25 × moderate value                                                |      |
| 342190                                                 | frisbee (general)                                                 |                        |                                                                      |      |
| 342191                                                 | frisbee (general) - light effort                                  | 2.0                    | 0.75 × moderate value                                                |      |

---

---

|                                         |                                                    |            |                                                              |      |
|-----------------------------------------|----------------------------------------------------|------------|--------------------------------------------------------------|------|
| 342192                                  | frisbee (general) - moderate effort                | 3.0        | Ainsworth 15240 - frisbee playing, general                   | [3]  |
| 342193                                  | frisbee (general) - hard effort                    | 6.0        | 1.25 × moderate value                                        |      |
| 342200                                  | frisbee (ultimate)                                 |            |                                                              |      |
| 342201                                  | frisbee (ultimate) - light effort                  | 6.0        | 0.75 × moderate value                                        |      |
| 342202                                  | frisbee (ultimate) - moderate effort               | 8.0        | Ainsworth 15250 - frisbee, ultimate                          | [3]  |
| 342203                                  | frisbee (ultimate) - hard effort                   | 10.0       | 1.25 × moderate value                                        |      |
| 341210                                  | golf                                               |            |                                                              |      |
| 341211                                  | golf - light effort                                | 3.0        | Ainsworth 15270 - golf, miniature, driving ranges            | [3]  |
| 341212                                  | golf - moderate effort                             | 4.3        | Ainsworth 15285 - golf, walking and pulling clubs            | [3]  |
| 341213                                  | golf - hard effort                                 | 4.5        | Ainsworth 15255 - golf, general                              | [3]  |
| <b>341220 gymnastics</b>                |                                                    |            |                                                              |      |
| <b>341221</b>                           | <b>gymnastics - light effort</b>                   | <b>3.0</b> | 0.75 × moderate value                                        |      |
| <b>341222</b>                           | <b>gymnastics - moderate effort</b>                | <b>4.0</b> | gymnastics measured in 1 child study, n = 78.                | [27] |
| <b>341223</b>                           | <b>gymnastics - hard effort</b>                    | <b>5.0</b> | 1.25 × moderate value                                        |      |
| 341230                                  | hacky sack                                         |            |                                                              |      |
| 341231                                  | hacky sack - light effort                          | 3.0        | 0.75 × moderate value                                        |      |
| 341232                                  | hacky sack - moderate effort                       | 4.0        | Ainsworth 15310 - hacky sack                                 | [3]  |
| 341233                                  | hacky sack - hard effort                           | 5.0        | 1.25 × moderate value                                        |      |
| <b>342240 hand tennis (four-square)</b> |                                                    |            |                                                              |      |
| <b>342241</b>                           | <b>hand tennis (four-square) - light effort</b>    | <b>3.8</b> | 0.75 × moderate value                                        |      |
| <b>342242</b>                           | <b>hand tennis (four-square) - moderate effort</b> | <b>5.0</b> | playground games measured in 1 child study, n = 37           | [27] |
| <b>342243</b>                           | <b>hand tennis (four-square) - hard effort</b>     | <b>6.3</b> | 1.25 × moderate value                                        |      |
| 342830                                  | hide and seek                                      | 4.0        | Ainsworth 05175 - walk/run - playing with children, moderate | [3]  |
| 342260                                  | hockey (field)                                     |            |                                                              |      |
| 342261                                  | hockey (field) - light effort                      | 6.0        | 0.75 × moderate value                                        |      |

---

---

|                         |                                                         |            |                                                                   |          |
|-------------------------|---------------------------------------------------------|------------|-------------------------------------------------------------------|----------|
| 342262                  | hockey (field) - moderate effort                        | 8.0        | Ainsworth 15350 – field hockey                                    | [3]      |
| 342263                  | hockey (field) - hard effort                            | 10.0       | 1.25 × moderate value                                             |          |
| 342270                  | hockey (ice)                                            |            |                                                                   |          |
| 342271                  | hockey (ice) - light effort                             | 6.0        | 0.75 × moderate value                                             |          |
| 342272                  | hockey (ice) - moderate effort                          | 8.0        | Ainsworth 15360 - ice hockey                                      | [3]      |
| 342273                  | hockey (ice) - hard effort                              | 10.0       | 1.25 × moderate value                                             |          |
| <b>341280 hopscotch</b> |                                                         |            |                                                                   |          |
| <b>341281</b>           | <b>hopscotch - light effort</b>                         | <b>4.4</b> | 0.75 × moderate value                                             |          |
| <b>341282</b>           | <b>hopscotch - moderate effort</b>                      | <b>5.9</b> | hopscotch measured in two child studies, n = 51                   | [14, 15] |
| <b>341283</b>           | <b>hopscotch - hard effort</b>                          | <b>7.4</b> | 1.25 × moderate value                                             |          |
| 321290                  | horseback riding                                        |            |                                                                   |          |
| 321291                  | horseback riding - light effort                         | 2.5        | Ainsworth 15400 - horseback riding, walking                       | [3]      |
| 321292                  | horseback riding - moderate effort                      | 4.0        | Ainsworth 15370 - horseback riding, general                       | [3]      |
| 321293                  | horseback riding - hard effort                          | 6.5        | Ainsworth 15390 - horseback riding, trotting                      | [3]      |
| 341300                  | ice skating                                             |            |                                                                   |          |
| 341301                  | ice skating - light effort                              | 5.5        | Ainsworth 19020 - ice skating, 4 m.s <sup>-1</sup>                | [3]      |
| 341302                  | ice skating - moderate effort                           | 7.0        | Ainsworth 19030 - ice skating, general                            | [3]      |
| 341303                  | ice skating - hard effort                               | 9.0        | Ainsworth 19040 - ice skating, > 4 m.s <sup>-1</sup>              | [3]      |
| 331330                  | juggling                                                | 4.0        | Ainsworth 15440 - juggling                                        | [3]      |
| 341320                  | karate/martial arts/judo/kick boxing                    |            |                                                                   |          |
| 341321                  | karate/martial arts/judo/kick boxing - light effort     | 7.5        | 0.75 × moderate value                                             |          |
| 341322                  | karate/martial arts/judo /kick boxing - moderate effort | 10.0       | Ainsworth 15430 - judo, jujitsu, karate, kick boxing, tae kwan do | [3]      |
| 341323                  | karate/martial arts/judo/kick boxing - hard effort      | 12.5       | 1.25 × moderate value                                             |          |

---



---

|                                         |                                                    |            |                                                                                   |      |
|-----------------------------------------|----------------------------------------------------|------------|-----------------------------------------------------------------------------------|------|
| 341340                                  | kayaking                                           |            |                                                                                   |      |
| 341341                                  | kayaking - light effort                            | 3.8        | 0.75 × moderate value                                                             |      |
| 341342                                  | kayaking - moderate effort                         | 5.0        | Ainsworth 18100 - kayaking                                                        | [3]  |
| 341343                                  | kayaking - hard effort                             | 6.3        | 1.25 × moderate value                                                             |      |
| 342350                                  | kickball                                           |            |                                                                                   |      |
| 342351                                  | kickball - light effort                            | 5.3        | 0.75 × moderate value                                                             |      |
| 342352                                  | kickball - moderate effort                         | 7.0        | Ainsworth 15450 - kickball                                                        | [3]  |
| 342353                                  | kickball - hard effort                             | 8.8        | 1.25 × moderate value                                                             |      |
| <b>342360 lacrosse</b>                  |                                                    |            |                                                                                   |      |
| <b>342361</b>                           | <b>lacrosse - light effort</b>                     | <b>4.8</b> | 0.75 × moderate value                                                             |      |
| <b>342362</b>                           | <b>lacrosse - moderate effort</b>                  | <b>6.4</b> | lacrosse measured in 1 child study, n = 37                                        | [27] |
| <b>342363</b>                           | <b>lacrosse - hard effort</b>                      | <b>8.0</b> | 1.25 × moderate value                                                             |      |
| 342370                                  | lawn bowls                                         | 3.0        | Ainsworth 15570 - lawn bowling                                                    | [3]  |
| <b>331960 lifting weights</b>           |                                                    |            |                                                                                   |      |
| <b>331961</b>                           | <b>lifting weights - light effort</b>              | <b>2.1</b> | 0.75 × moderate value                                                             |      |
| <b>331962</b>                           | <b>lifting weights - moderate effort</b>           | <b>2.8</b> | weight lifting (bench press and leg press) measured in 1 child study, n = 510     | [8]  |
| <b>331963</b>                           | <b>lifting weights - hard effort</b>               | <b>3.5</b> | 1.25 x moderate value                                                             |      |
| 341970                                  | mini golf or putt putt                             | 3.0        | Ainsworth 15270 - golf, miniature, driving range                                  | [3]  |
| 341980                                  | unstructured indoor play - walk/run                | 4.0        | Ainsworth 05175 - walk/run, playing with child(ren), moderate only active periods | [3]  |
| 321960                                  | unstructured indoor play - sitting                 | 2.3        | Ainsworth 05170 - sitting, playing with child(ren): light, only active periods    | [3]  |
| <b>341990 unstructured outdoor play</b> |                                                    |            |                                                                                   |      |
| <b>341991</b>                           | <b>unstructured outdoor play - light effort</b>    | <b>3.8</b> | 0.75 x moderate value                                                             |      |
| <b>341992</b>                           | <b>unstructured outdoor play - moderate effort</b> | <b>5.0</b> | playground games measured in 1 child study, n = 37                                | [27] |

---

---

|                                                                         |                         |                                                                                                          |          |
|-------------------------------------------------------------------------|-------------------------|----------------------------------------------------------------------------------------------------------|----------|
| <b>341993 unstructured outdoor play - hard effort</b>                   | <b>6.3</b>              | 1.25 × moderate value                                                                                    |          |
| <b>342380 netball</b>                                                   |                         |                                                                                                          |          |
| <b>342381 netball - light effort</b>                                    | <b>7.2<sup>a</sup></b>  | movement pattern similar to shooting hoops measured in 1 child study, n = 74                             | [35]     |
| <b>342382 netball - moderate effort</b>                                 | <b>8.2<sup>a</sup></b>  | movement pattern similar to basketball measured in 1 child study, n = 12                                 | [37]     |
| <b>342383 netball - hard effort</b>                                     | <b>10.1<sup>a</sup></b> | movement pattern similar to basketball – fast dribbling and shooting, measured in 1 child study, n = 19. | [26]     |
| 341390 orienteering                                                     |                         |                                                                                                          |          |
| 341391 orienteering - light effort                                      | 7.0                     | 0.75 × moderate value                                                                                    |          |
| 341392 orienteering - moderate effort                                   | 9.0                     | Ainsworth 15480 - orienteering                                                                           | [3]      |
| 341393 orienteering - hard effort                                       | 11.0                    | 1.25 × moderate value                                                                                    |          |
| 342400 paddleball                                                       |                         |                                                                                                          |          |
| 342401 paddleball - light effort                                        | 4.5                     | 0.75 × moderate value                                                                                    |          |
| 342402 paddleball - moderate effort                                     | 6.0                     | Ainsworth 15500 - paddleball                                                                             | [3]      |
| 342403 paddleball - hard effort                                         | 7.5                     | 1.25 × moderate value                                                                                    |          |
| <b>341900 playground equipment (e.g. monkey bars)</b>                   |                         |                                                                                                          |          |
| <b>341901 playground equipment (e.g. monkey bars) - light effort</b>    | <b>3.8</b>              | 0.75 × moderate value                                                                                    |          |
| <b>341902 playground equipment (e.g. monkey bars) - moderate effort</b> | <b>5.0</b>              | playground games measured in 1 child study, n = 37                                                       | [27]     |
| <b>341903 playground equipment (e.g. monkey bars) - hard effort</b>     | <b>6.3</b>              | 1.25 × moderate value                                                                                    |          |
| <b>342770 playing catch</b>                                             |                         |                                                                                                          |          |
| <b>342771 playing catch - light effort</b>                              | <b>2.0</b>              | 0.75 × moderate value                                                                                    |          |
| <b>342772 playing catch - moderate effort</b>                           | <b>2.6</b>              | catching measured in 2 child studies, n = 51                                                             | [14, 15] |
| <b>342773 playing catch - hard effort</b>                               | <b>3.3</b>              | 1.25 × moderate value                                                                                    |          |

---

|                                                           |                        |                                                                                         |             |
|-----------------------------------------------------------|------------------------|-----------------------------------------------------------------------------------------|-------------|
| <b>321880 playing in sandpit</b>                          | <b>1.6<sup>a</sup></b> | movement pattern similar to sitting, playing puzzles measured in 3 child study, n = 312 | [8, 23, 42] |
| 321950 playing with animals - sitting                     | 2.5                    | Ainsworth 05190 - sitting, playing with animals                                         | [3]         |
| 341290 playing with animals - walk/run                    |                        |                                                                                         |             |
| 341291 playing with animals - walk/run - light effort     | 2.8                    | Ainsworth 05192 - walk/run, playing with animals, light                                 | [3]         |
| 341292 playing with animals - walk/run - moderate effort  | 4.0                    | Ainsworth 05193 - walk/run, playing with animals, moderate                              | [3]         |
| 341293 playing with animals - walk/run - hard effort      | 5.0                    | Ainsworth 05194 - walk/run, playing with animals, vigorous                              | [3]         |
| <b>321920 playing with toys/lego/dolls/action figures</b> | <b>1.6<sup>a</sup></b> | movement pattern similar to sitting, playing puzzles measured in 3 child study, n = 312 | [8, 23, 42] |
| 342760 playing with young children                        |                        |                                                                                         |             |
| 342761 playing with young children - light effort         | 2.8                    | Ainsworth 05171 - standing, playing with children, light                                | [3]         |
| 342762 playing with young children - moderate effort      | 4.0                    | Ainsworth 05175 - walk/run - playing with children, moderate                            | [3]         |
| 342763 playing with young children - hard effort          | 5.0                    | Ainsworth 05180 - walk/run, playing with children, vigorous                             | [3]         |
| <b>341820 pogo stick</b>                                  |                        |                                                                                         |             |
| <b>341821 pogo stick - light effort</b>                   | 6.5                    | 0.75 × moderate value                                                                   |             |
| <b>341822 pogo stick - moderate effort</b>                | <b>8.7</b>             | movement pattern similar to trampoline measured in 1 child study, n = 19.               | [26]        |
| <b>341823 pogo stick - hard effort</b>                    | 10.9                   | 1.25 × moderate value                                                                   |             |
| 332040 pool/billiards/snooker                             | 2.5                    | Ainsworth 15080 - billiards                                                             | [3]         |
| 331420 quoits                                             | 3.0                    | Ainsworth 15410 - horse pitching, quoits                                                | [3]         |
| 341890 race walking                                       |                        |                                                                                         |             |
| 341891 race walking - light effort                        | 4.9                    | 0.75 × moderate value                                                                   |             |

---

|               |                                                                         |            |                                                                                       |      |
|---------------|-------------------------------------------------------------------------|------------|---------------------------------------------------------------------------------------|------|
| 341892        | race walking - moderate effort                                          | 6.5        | Ainsworth 17110 - race walking                                                        | [3]  |
| 341893        | race walking - hard effort                                              | 8.1        | 1.25 × moderate value                                                                 |      |
| 342430        | racquetball                                                             |            |                                                                                       |      |
| 342431        | racquetball - light effort                                              | 5.3        | 0.75 × moderate value                                                                 |      |
| 342432        | racquetball - moderate effort                                           | 7.0        | Ainsworth 15530 - racquetball, general                                                | [3]  |
| 342433        | racquetball - hard effort                                               | 8.8        | 1.25 × moderate value                                                                 |      |
| <b>342440</b> | <b>red rover/octopus tag/British bulldog/bullrush</b>                   |            |                                                                                       |      |
| <b>342441</b> | <b>red rover/octopus tag/British bulldog/bullrush - light effort</b>    | <b>3.8</b> | 0.75 × moderate value                                                                 |      |
| <b>342442</b> | <b>red rover/octopus tag/British bulldog/bullrush - moderate effort</b> | <b>5.0</b> | playground games measured in 1 child study, n = 37                                    | [27] |
| <b>342443</b> | <b>red rover/octopus tag/British bulldog/bullrush - hard effort</b>     | <b>6.3</b> | 1.25 × moderate value                                                                 |      |
| <b>341240</b> | <b>riding a bicycle/bike</b>                                            |            |                                                                                       |      |
| <b>341241</b> | <b>riding a bicycle/bike - light effort</b>                             | <b>4.7</b> | 0.75 × moderate value                                                                 |      |
| <b>341242</b> | <b>riding a bicycle/bike - moderate effort</b>                          | <b>6.2</b> | riding a bicycle outdoors at 5.3 m.s <sup>-1</sup> measured in 1 child study, n = 74. | [35] |
| <b>341243</b> | <b>riding a bicycle/bike - hard effort</b>                              | <b>7.8</b> | 1.25 × moderate value                                                                 |      |
| <b>341250</b> | <b>riding a scooter</b>                                                 |            |                                                                                       |      |
| <b>341251</b> | <b>riding a scooter - light effort</b>                                  | <b>4.9</b> | 0.75 × moderate value                                                                 |      |
| <b>341252</b> | <b>riding a scooter - moderate effort</b>                               | <b>6.5</b> | riding a scooter measured in 1 child study, n = 30                                    | [39] |
| <b>341253</b> | <b>riding a scooter - hard effort</b>                                   | <b>8.1</b> | 1.25 × moderate value                                                                 |      |
| 341270        | riding a skateboard                                                     |            |                                                                                       |      |
| 341271        | riding a skateboard - light effort                                      | 3.8        | 0.75 × moderate value                                                                 |      |
| 341272        | riding a skateboard - moderate effort                                   | 5.0        | Ainsworth 15580 - skateboarding                                                       | [3]  |
| 341273        | riding a skateboard - hard effort                                       | 6.3        | 1.25 × moderate value                                                                 |      |
| 341450        | rockclimbing                                                            |            |                                                                                       |      |
| 341451        | rockclimbing - light effort                                             | 6.0        | 0.75 × moderate value                                                                 |      |

---

---

|                                               |                                                          |                        |                                                                             |      |
|-----------------------------------------------|----------------------------------------------------------|------------------------|-----------------------------------------------------------------------------|------|
| 341452                                        | rockclimbing - moderate effort                           | 8.0                    | Ainsworth 15540 - rock climbing, rapelling                                  | [3]  |
| 341453                                        | rockclimbing - hard effort                               | 11.0                   | Ainsworth 15535 - rock climbing, ascending rock                             | [3]  |
| <b>341310 rollerblading (in-line skating)</b> |                                                          |                        |                                                                             |      |
| <b>341311</b>                                 | <b>rollerblading (in-line skating) - light effort</b>    | <b>4.9</b>             | 0.75 × moderate value                                                       |      |
| <b>341312</b>                                 | <b>rollerblading (in-line skating) - moderate effort</b> | <b>6.5</b>             | rollerblading measured in 1 child study, n = 26                             | [39] |
| <b>341313</b>                                 | <b>rollerblading (in-line skating) - hard effort</b>     | <b>8.1</b>             | 1.25 × moderate value                                                       |      |
| <b>341460 rollerskating</b>                   |                                                          |                        |                                                                             |      |
| <b>341461</b>                                 | <b>rollerskating - light effort</b>                      | <b>4.9<sup>a</sup></b> | 0.75 × moderate value                                                       |      |
| <b>341462</b>                                 | <b>rollerskating - moderate effort</b>                   | <b>6.5<sup>a</sup></b> | movement pattern similar to rollerblading measured in 1 child study, n = 26 | [39] |
| <b>341463</b>                                 | <b>rollerskating - hard effort</b>                       | <b>8.1<sup>a</sup></b> | 1.25 × moderate value                                                       |      |
| 341090                                        | rowing/canoeing                                          |                        |                                                                             |      |
| 341091                                        | rowing/canoeing - light effort                           | 3.0                    | Ainsworth (canoeing, rowing 2.0-3.9 mph, light effort)                      | [3]  |
| 341092                                        | rowing/canoeing - moderate effort                        | 7.0                    | Ainsworth 18050 (canoeing, rowing 4.0-5.9 mph, mod effort)                  | [3]  |
| 341093                                        | rowing/canoeing - hard effort                            | 12.0                   | Ainsworth 18060 (canoeing, rowing >6 mph, vig effort)                       | [3]  |
| <b>342160 rugby league</b>                    |                                                          |                        |                                                                             |      |
| <b>342161</b>                                 | <b>rugby league - light effort</b>                       | <b>6.6</b>             | 0.75 × moderate value                                                       |      |
| <b>342162</b>                                 | <b>rugby league - moderate effort</b>                    | <b>8.8<sup>a</sup></b> | movement pattern similar to soccer measured in 1 child study, n = 25        | [27] |
| <b>342163</b>                                 | <b>rugby league - hard effort</b>                        | <b>11.0</b>            | 1.25 × moderate value                                                       |      |
| <b>342170 rugby union</b>                     |                                                          |                        |                                                                             |      |
| <b>342171</b>                                 | <b>rugby union - light effort</b>                        | <b>6.6</b>             | 0.75 × moderate value                                                       |      |
| <b>342172</b>                                 | <b>rugby union - moderate effort</b>                     | <b>8.8<sup>a</sup></b> | movement pattern similar to soccer measured in 1 child study, n = 25        | [27] |

---

---

|               |                                          |                        |                                                                                                                                                                                                                |     |
|---------------|------------------------------------------|------------------------|----------------------------------------------------------------------------------------------------------------------------------------------------------------------------------------------------------------|-----|
| <b>342173</b> | <b>rugby union - hard effort</b>         | <b>11.0</b>            | 1.25 × moderate value                                                                                                                                                                                          |     |
| <b>341480</b> | <b>running /jogging</b>                  |                        |                                                                                                                                                                                                                |     |
| <b>341481</b> | <b>running/jogging - light effort</b>    | <b>7.7<sup>b</sup></b> | regression equation developed based on 31 child studies:<br>METs = 0.27 age + 1.91 speed (m.s <sup>-1</sup> ) + 0.46, r = 0.61, SEE = 1.4 METs, n = 1974.<br>Light speed <sup>d</sup> = 2.08 m.s <sup>-1</sup> | [9] |
| <b>341482</b> | <b>running/jogging - moderate effort</b> | <b>8.5<sup>b</sup></b> | As above<br>Moderate speed <sup>d</sup> = 2.50 m.s <sup>-1</sup>                                                                                                                                               | [9] |
| <b>341483</b> | <b>running/jogging - hard effort</b>     | <b>9.3<sup>b</sup></b> | As above<br>Hard speed <sup>d</sup> = 2.92 m.s <sup>-1</sup>                                                                                                                                                   | [9] |
| 331490        | sailboard/windsurfing                    |                        |                                                                                                                                                                                                                |     |
| 331491        | sailboard/windsurfing - light effort     | 2.0                    | 0.75 × moderate value                                                                                                                                                                                          |     |
| 331492        | sailboard/windsurfing - moderate effort  | 3.0                    | Ainsworth 18120 - windsurfing                                                                                                                                                                                  | [3] |
| 331493        | sailboard/windsurfing - hard effort      | 5.0                    | 1.25 × moderate value                                                                                                                                                                                          |     |
| 321940        | sailing/boating                          |                        |                                                                                                                                                                                                                |     |
| 321941        | sailing/boating - light effort           | 2.3                    | 0.75 × moderate value                                                                                                                                                                                          |     |
| 321942        | sailing/boating - moderate effort        | 3.0                    | Ainsworth 18120 - sailing, boat sailing, wind surfing                                                                                                                                                          | [3] |
| 321943        | sailing/boating - hard effort            | 3.8                    | 1.25 × moderate value                                                                                                                                                                                          |     |
| 341500        | shuffleboard                             |                        |                                                                                                                                                                                                                |     |
| 341501        | shuffleboard - light effort              | 2.3                    | 0.75 × moderate value                                                                                                                                                                                          |     |
| 341502        | shuffleboard - moderate effort           | 3.0                    | Ainsworth 15570 - shuffleboard, lawn bowling                                                                                                                                                                   | [3] |
| 341503        | shuffleboard - hard effort               | 4.0                    | 1.25 × moderate value                                                                                                                                                                                          |     |
| 341520        | skiing (cross-country)                   |                        |                                                                                                                                                                                                                |     |
| 341521        | skiing (cross-country) - light effort    | 7.0                    | Ainsworth 19080 - cross country skiing, slow or light effort                                                                                                                                                   | [3] |
| 341522        | skiing (cross-country) - moderate effort | 8.0                    | Ainsworth 19090 - cross country skiing, moderate speed and effort                                                                                                                                              | [3] |
| 341523        | skiing (cross-country) - hard effort     | 9.0                    | Ainsworth 19100 - cross country skiing, fast effort                                                                                                                                                            | [3] |

---

---

|                                     |                                                |             |                                                     |      |  |
|-------------------------------------|------------------------------------------------|-------------|-----------------------------------------------------|------|--|
| 341530                              | skiing (downhill)                              |             |                                                     |      |  |
| 341531                              | skiing (downhill) - light effort               | 5.0         | Ainsworth 19150 - skiing, downhill, light effort    | [3]  |  |
| 341532                              | skiing (downhill) - moderate effort            | 6.0         | Ainsworth 19160 - skiing, downhill, moderate effort | [3]  |  |
| 341533                              | skiing (downhill) - hard effort                | 8.0         | Ainsworth 19170 - skiing, downhill, vigorous effort | [3]  |  |
| 341540                              | skindiving (SCUBA)                             |             |                                                     |      |  |
| 341541                              | skindiving (SCUBA) - light effort              | 7.0         | Ainsworth 18200 - skindiving, scuba diving, general | [3]  |  |
| 341542                              | skindiving (SCUBA) - moderate effort           | 12.5        | Ainsworth 18190 - skindiving, moderate              | [3]  |  |
| 341543                              | skindiving (SCUBA) - hard effort               | 16.0        | Ainsworth 18180 - skindiving - fast                 | [3]  |  |
| <b>341470 skipping/jump rope</b>    |                                                |             |                                                     |      |  |
| <b>341471</b>                       | <b>skipping/jump rope - light effort</b>       | <b>6.2</b>  | 0.75 × moderate value                               |      |  |
| <b>341472</b>                       | <b>skipping/jump rope - moderate effort</b>    | <b>8.3</b>  | skipping measured in 1 child study, n = 262         | [8]  |  |
| <b>341473</b>                       | <b>skipping/jump rope - hard effort</b>        | <b>10.3</b> | 1.25 × moderate value                               |      |  |
| 341550                              | snorkelling                                    |             |                                                     |      |  |
| 341551                              | snorkelling - light effort                     | 3.8         | 0.75 × moderate value                               |      |  |
| 341552                              | snorkelling - moderate effort                  | 5.0         | Ainsworth 18210 - snorkeling                        | [3]  |  |
| 341553                              | snorkelling - hard effort                      | 6.3         | 1.25 × moderate value                               |      |  |
| <b>342180 soccer (field/indoor)</b> |                                                |             |                                                     |      |  |
| <b>342181</b>                       | <b>soccer (field/indoor) - light effort</b>    | <b>6.6</b>  | 0.75 × moderate value                               |      |  |
| <b>342182</b>                       | <b>soccer (field/indoor) - moderate effort</b> | <b>8.8</b>  | soccer measured in 1 child study, n = 25            | [27] |  |
| <b>342183</b>                       | <b>soccer (field/indoor) - hard effort</b>     | <b>11.0</b> | 1.25 × moderate value                               |      |  |
| 342560                              | softball or t-ball                             |             |                                                     |      |  |
| 342561                              | softball or t-ball - light effort              | 3.8         | 0.75 × moderate value                               |      |  |
| 342562                              | softball or t-ball - moderate effort           | 5.0         | Ainsworth 15620 - baseball or softball, general     | [3]  |  |
| 342563                              | softball or t-ball - hard effort               | 6.3         | 1.25 × moderate value                               |      |  |
| 341570                              | speed skating (competitive)                    |             |                                                     |      |  |

---

---

|               |                                               |             |                                                                     |      |
|---------------|-----------------------------------------------|-------------|---------------------------------------------------------------------|------|
| 341571        | speed skating (competitive) - light effort    | 7.0         | Ainsworth 19030 - ice skating, general                              | [3]  |
| 341572        | speed skating (competitive) - moderate effort | 9.0         | Ainsworth 19040 - ice skating, > 4 m.s <sup>-1</sup>                | [3]  |
| 341573        | speed skating (competitive) - hard effort     | 15.0        | Ainsworth 19050 - speed skating, competitive                        | [3]  |
| 342580        | squash                                        |             |                                                                     |      |
| 342581        | squash - light effort                         | 5.3         | 0.75 × moderate value                                               |      |
| 342582        | squash - moderate effort                      | 7.0         | movement pattern similar to racquetball - Ainsworth 15530           | [3]  |
| 342583        | squash - hard effort                          | 8.8         | 0.75 × moderate value                                               |      |
| <b>331590</b> | <b>stretching exercises</b>                   | <b>2.5</b>  | stretching exercises measured in 1 child study, n = 264             | [8]  |
| 341600        | surfing (body or board)                       |             |                                                                     |      |
| 341601        | surfing (body or board) - light effort        | 3.8         | 0.75 × moderate value                                               |      |
| 641602        | surfing (body or board) - moderate effort     | 5.0         | Ainsworth 18220 - surfing, body or board                            | [3]  |
| 341603        | surfing (body or board) - hard effort         | 6.3         | 1.25 × moderate value                                               |      |
| 341930        | swimming (playing in pool)                    |             |                                                                     |      |
| 341931        | swimming (playing in pool) - light effort     | 3.0         | Ainsworth 18365 - water volleyball                                  | [3]  |
| 341932        | swimming (playing in pool) - moderate effort  | 4.0         | Ainsworth 18350 - swimming, treading water moderate effort          | [3]  |
| 341933        | swimming (playing in pool) - hard effort      | 5.0         | 1.25 × moderate value                                               |      |
| <b>341610</b> | <b>swimming laps</b>                          |             |                                                                     |      |
| <b>341611</b> | <b>swimming laps - light effort</b>           | <b>8.4</b>  | swimming at 0.9 m.s <sup>-1</sup> measured in 1 child study, n = 11 | [40] |
| <b>341612</b> | <b>swimming laps - moderate effort</b>        | <b>9.9</b>  | swimming at 1.0 m.s <sup>-1</sup> measured in 1 child study, n = 21 | [40] |
| <b>341613</b> | <b>swimming laps - hard effort</b>            | <b>11.6</b> | swimming at 1.1 m.s <sup>-1</sup> measured in 1 child study, n = 11 | [40] |
| 342620        | table tennis                                  |             |                                                                     |      |

---



---

|               |                                         |                         |                                                                      |      |
|---------------|-----------------------------------------|-------------------------|----------------------------------------------------------------------|------|
| 342621        | table tennis - light effort             | 3.0                     | 0.75 × moderate value                                                |      |
| 342622        | table tennis - moderate effort          | 4.0                     | Ainsworth 15660 - table tennis, ping pong                            | [3]  |
| 342623        | table tennis - hard effort              | 5.0                     | 1.25 × moderate value                                                |      |
| <b>331630</b> | <b>tai chi/yoga</b>                     | <b>2.5<sup>a</sup></b>  | stretching exercises measured in 1 child study, n = 264              | [8]  |
| <b>341800</b> | <b>tap dancing</b>                      |                         |                                                                      |      |
| <b>341801</b> | <b>tap dancing - light effort</b>       | <b>3.0</b>              | 0.75 × moderate value                                                |      |
| <b>341802</b> | <b>tap dancing - moderate effort</b>    | <b>4.8</b>              | dancing measured in one child study, n = 36                          | [27] |
| <b>341803</b> | <b>tap dancing - hard effort</b>        | <b>7.0</b>              | 1.25 × moderate value                                                |      |
| 342640        | tennis (court)                          |                         |                                                                      |      |
| 342641        | tennis (court) - light effort           | 5.3                     | 0.75 × moderate value                                                |      |
| 342642        | tennis (court) - moderate effort        | 7.0                     | Ainsworth 15675 - tennis, general                                    | [3]  |
| 342643        | tennis (court) - hard effort            | 8.8                     | 1.25 × moderate value                                                |      |
| <b>342060</b> | <b>tenpin bowling</b>                   | <b>4.9</b>              | bowling measured in 1 child study, n = 12                            | [37] |
| 331990        | totem tennis                            |                         |                                                                      |      |
| 331991        | totem tennis - light effort             | 3.8                     | 0.75 × moderate value                                                |      |
| 331992        | totem tennis - moderate effort          | 5.0                     | Ainsworth 15135 - children's games, tetherball                       | [3]  |
| 331993        | totem tennis - hard effort              | 6.3                     | 1.25 × moderate value                                                |      |
| <b>342810</b> | <b>touch football</b>                   |                         |                                                                      |      |
| <b>342811</b> | <b>touch football - light effort</b>    | <b>6.6</b>              | 0.75 × moderate value                                                |      |
| <b>342812</b> | <b>touch football - moderate effort</b> | <b>8.8<sup>a</sup></b>  | movement pattern similar to soccer measured in 1 child study, n = 25 | [27] |
| <b>342813</b> | <b>touch football - hard effort</b>     | <b>11.0<sup>a</sup></b> | 1.25 × moderate value                                                |      |
| <b>341680</b> | <b>trampoline</b>                       |                         |                                                                      |      |
| <b>341681</b> | <b>trampoline - light effort</b>        | 6.5                     | 0.75 × moderate value                                                |      |
| <b>341682</b> | <b>trampoline - moderate effort</b>     | 8.7                     | trampoline measured in 1 child study, n = 19.                        | [26] |
| <b>341683</b> | <b>trampoline - hard effort</b>         | 10.9                    | 1.25 × moderate value                                                |      |
| 342700        | volleyball (beach)                      |                         |                                                                      |      |

---

---

|                    |                                                 |            |                                                                                   |          |
|--------------------|-------------------------------------------------|------------|-----------------------------------------------------------------------------------|----------|
| 342701             | volleyball (beach) - light effort               | 6.0        | 0.75 × moderate value                                                             |          |
| 342702             | volleyball (beach) - moderate effort            | 8.0        | Ainsworth 15725 - beach volleyball                                                | [3]      |
| 342703             | volleyball (beach) - hard effort                | 10.0       | 1.25 × moderate value                                                             |          |
| 342690             | volleyball (court)                              |            |                                                                                   |          |
| 342691             | volleyball (court) - light effort               | 3.0        | 0.75 × moderate value                                                             |          |
| 342692             | volleyball (court) - moderate effort            | 4.0        | Ainsworth 15710 - volleyball                                                      | [3]      |
| 342693             | volleyball (court) - hard effort                | 5.0        | 1.25 × moderate value                                                             |          |
| 342710             | wallyball/modified volleyball                   |            |                                                                                   |          |
| 342711             | wallyball/modified volleyball - light effort    | 5.3        | 0.75 × moderate value                                                             |          |
| 342712             | wallyball/modified volleyball - moderate effort | 7.0        | Ainsworth 15731 - wallyball, general                                              | [3]      |
| 342713             | wallyball/modified volleyball - hard effort     | 8.8        | 1.25 × moderate value                                                             |          |
| 331730             | water skiing                                    |            |                                                                                   |          |
| 331731             | water skiing - light effort                     | 4.5        | 0.75 × moderate value                                                             |          |
| 331732             | water skiing - moderate effort                  | 6.0        | Ainsworth 18150 - skiing, water                                                   | [3]      |
| 331733             | water skiing - hard effort                      | 7.5        | 1.25 × moderate value                                                             |          |
| 341740             | whitewater rafting                              |            |                                                                                   |          |
| 341741             | whitewater rafting - light effort               | 3.8        | 0.75 × moderate value                                                             |          |
| 341742             | whitewater rafting - moderate effort            | 5.0        | Ainsworth 18370 - whitewater rafting, kayaking, canoeing                          | [3]      |
| 341743             | whitewater rafting - hard effort                | 6.3        | 1.25 × moderate value                                                             |          |
| 342860             | wrestling with mates                            | 4.0        | Ainsworth 05175 - walk/run, playing with child(ren), moderate only active periods | [3]      |
| <b>SCHOOL WORK</b> |                                                 |            |                                                                                   |          |
| <b>420000</b>      | <b>arts and crafts - sitting</b>                | <b>1.6</b> | arts and crafts, sitting measured in 2 child studies, n = 101                     | [27, 36] |
| <b>430000</b>      | <b>arts and craft - standing</b>                | <b>1.9</b> | drawing, standing measured in 1 child study, n = 19                               | [38]     |

---

---

|                                                       |                        |                                                                                                                               |                         |
|-------------------------------------------------------|------------------------|-------------------------------------------------------------------------------------------------------------------------------|-------------------------|
| <b>440160 carrying sports equipment</b>               | <b>4.2<sup>a</sup></b> | walking carrying an 8.5 kg backpack measured in 1 child study, n = 35                                                         | [32]                    |
| 420050 computer work (e.g. typing/internet)           | 1.8                    | Ainsworth 09040 - sitting, typing                                                                                             | [3]                     |
| <b>420090 crayoning</b>                               | <b>1.4</b>             | crayoning measured in 2 child studies, n = 51                                                                                 | [14, 15]                |
| 430070 drama class                                    | 2.3                    | structure of drama class assumed to be 0.5 schoolwork (e.g. sitting, listening) and 0.5 acting (theatre actor)                | [3]                     |
| <b>420010 drawing - sitting</b>                       | <b>1.4<sup>a</sup></b> | movement pattern similar to crayoning measured in 2 child studies, n = 51                                                     | [14, 15]                |
| <b>430100 drawing - standing</b>                      | <b>1.9</b>             | drawing, standing measured in 1 child study, n = 19                                                                           | [38]                    |
| <b>430080 giving a talk/presentation</b>              | <b>1.6<sup>a</sup></b> | movement pattern similar to standing, singing measured in 1 child study, n = 17                                               | [20]                    |
| <b>420130 morning organisation/books and pens out</b> | <b>1.4</b>             | school work, sitting measured in 5 studies, n = 442                                                                           | [8, 23, 27, 29, 36]     |
| 440170 packing up/chairs up - end of school           | 2.5                    | movement pattern similar to Ainsworth 05040 – cleaning, light (dusting, straightening up, changing linen, carrying out trash) | [3]                     |
| 430140 packing/unpacking bag                          | 2.5                    | Ainsworth 05055 - home activities, putting away groceries                                                                     | [3]                     |
| 420020 reading - sitting                              | 1.3 <sup>a</sup>       | Ainsworth 09030 - sitting - reading book, newspaper, etc                                                                      | [3]                     |
| 430020 reading - standing                             | 1.8                    | Ainsworth 09070 - standing reading                                                                                            | [3]                     |
| <b>420120 roll call/class organisation</b>            | <b>1.4</b>             | sitting quietly measured in 9 child studies, n = 288                                                                          | [19, 21, 22, 25, 27-31] |
| 430150 school crossing monitor                        | 2.0                    | Ainsworth 09071 - standing, miscellaneous                                                                                     | [3]                     |

---

---

|                  |                                                                            |            |                                                                                 |                         |
|------------------|----------------------------------------------------------------------------|------------|---------------------------------------------------------------------------------|-------------------------|
| 420180           | science experiments – sitting                                              | 1.5        | Ainsworth 11580 – sitting, chemistry lab work                                   | [3]                     |
| 430190           | science experiments – standing                                             | 2.5        | Ainsworth 11430 – machine tooling                                               | [3]                     |
| <b>420110</b>    | <b>sitting quietly (e.g. assembly/listening to teacher)</b>                | <b>1.4</b> | sitting quietly measured in 9 child studies, n = 288                            | [19, 21, 22, 25, 27-31] |
| <b>420030</b>    | <b>studying/homework</b>                                                   | <b>1.4</b> | school work, sitting measured in 5 studies, n = 442                             | [8, 23, 27, 29, 36]     |
| <b>420040</b>    | <b>taking notes/class discussion</b>                                       | <b>1.4</b> | school work, sitting measured in 5 studies, n = 442                             | [8, 23, 27, 29, 36]     |
| 430090           | technical studies - standing light effort (e.g. electronics/machining etc) | 2.5        | Ainsworth 11430 – machine tooling                                               | [3]                     |
| 430110           | technical studies - standing moderate effort (e.g. carpentry/welding)      | 3.0        | Ainsworth 06040 – carpentry, general                                            | [3]                     |
| <b>420060</b>    | <b>writing - sitting</b>                                                   | <b>1.4</b> | school work, sitting measured in 5 studies, n = 442                             | [8, 23, 27, 29, 36]     |
| <b>SELF CARE</b> |                                                                            |            |                                                                                 |                         |
| 531000           | brushing or combing hair (standing)                                        | 2.5        | Ainsworth 13045 - hairstyling                                                   | [3]                     |
| 531010           | brushing teeth                                                             | 2.0        | Ainsworth 13040 - grooming, brushing teeth                                      | [3]                     |
| <b>533020</b>    | <b>dressing &amp; undressing</b>                                           | <b>2.7</b> | dressing and undressing measured in 2 child studies, n = 93                     | [27, 38]                |
| 522130           | drinking - sitting                                                         | 1.5        | movement pattern similar to Ainsworth 13030 - eating, sitting                   | [3]                     |
| 532140           | drinking while standing                                                    | 2.0        | movement pattern similar to Ainsworth 13035 - eating, standing                  | [3]                     |
| 522030           | eating - sitting                                                           | 1.5        | Ainsworth 13030 - eating, sitting                                               | [3]                     |
| 532040           | eating while standing                                                      | 2.0        | Ainsworth 13035 - eating, standing                                              | [3]                     |
| <b>553050</b>    | <b>getting ready for bed</b>                                               | <b>2.7</b> | movement pattern is dressing and undressing measured in 2 child studies, n = 93 | [27, 38]                |

---

|                                                                |                        |                                                        |                         |
|----------------------------------------------------------------|------------------------|--------------------------------------------------------|-------------------------|
| <b>521060 having hair done by someone else</b>                 | <b>1.4<sup>a</sup></b> | sitting quietly measured in 9 child studies, n = 288   | [19, 21, 22, 25, 27-31] |
| 534120 putting on makeup/sunscreen/contact lenses/grooming etc | 2.0                    | Ainsworth 13040 - grooming, putting on make-up         | [3]                     |
| 531070 showering & towelling off                               | 2.0                    | Ainsworth 13050 - showering, towelling off             | [3]                     |
| <b>521080 sitting in bath</b>                                  | <b>1.4<sup>a</sup></b> | sitting quietly measured in 9 child studies, n = 288   | [19, 21, 22, 25, 27-31] |
| <b>521090 sitting on toilet</b>                                | <b>1.4<sup>a</sup></b> | sitting quietly measured in 9 child studies, n = 288   | [19, 21, 22, 25, 27-31] |
| 531100 taking medicine                                         | 1.5                    | Ainsworth 13030 - eating, sitting                      | [3]                     |
| 534110 washing hands/face                                      | 2.0                    | Ainsworth 13040 - grooming, washing                    | [3]                     |
| <b>CHORES</b>                                                  |                        |                                                        |                         |
| <b>632000 bathing dog</b>                                      | <b>2.5</b>             | caring for animals measured in 1 child study, n = 17   | [27]                    |
| 642010 carrying small children                                 | 3.0                    | Ainsworth 05181 - carrying small children              | [3]                     |
| 641410 carrying very heavy items (e.g. moving furniture)       | 6.0                    | Ainsworth 05120 – carrying very heavy furniture        | [3]                     |
| 622020 child care (e.g. dressing)                              | 3.0                    | Ainsworth 05186 - child care standing, dressing        | [3]                     |
| 622030 child care (e.g. feeding)                               | 2.5                    | Ainsworth 05185 - child care sitting/kneeling, feeding | [3]                     |
| 633400 chopping wood                                           | 6.0                    | Ainsworth 08020 – chopping wood                        | [3]                     |
| 630040 cooking – standing                                      | 2.0                    | Ainsworth 05050- cooking or food preparation           | [3]                     |
| <b>632050 doing the laundry</b>                                | <b>2.6<sup>a</sup></b> | hanging out washing measured in 1 child study, n = 14  | [39]                    |
| <b>641060 dusting</b>                                          | <b>4.2</b>             | dusting measured in 1 child study, n = 24              | [23]                    |
| <b>642070 feeding pets or farm animals</b>                     | <b>2.5</b>             | caring for animals measured in 1 child study, n = 17   | [27]                    |

---

|               |                                                              |                        |                                                                     |                 |
|---------------|--------------------------------------------------------------|------------------------|---------------------------------------------------------------------|-----------------|
| 642360        | fixing things up (e.g. bike/toys/mechanical work on car etc) | 2.5                    | Ainsworth 05025, multiple household tasks all at once, light effort | [3]             |
| <b>643330</b> | <b>gardening</b>                                             | <b>3.7</b>             | gardening measured in 1 child study, n = 63                         | [27]            |
| <b>642080</b> | <b>hanging out washing</b>                                   | <b>2.6</b>             | hanging out washing measured in 1 child study, n = 14               | [39]            |
| 632090        | ironing                                                      | 2.3                    | Ainsworth 05070 - ironing                                           | [3]             |
| 622100        | knitting or sewing                                           | 1.5                    | Ainsworth 05080 - sitting, knitting, sewing                         | [3]             |
| 630370        | making recess or lunch                                       | 2.0                    | Ainsworth 05050 - cooking or food preparation                       | [3]             |
| <b>631110</b> | <b>making the bed</b>                                        | <b>3.4</b>             | making bed measured in 2 child studies, n = 78                      | [27, 39]        |
| <b>641120</b> | <b>mopping</b>                                               | <b>3.6<sup>a</sup></b> | sweeping measured in 4 child studies, n = 378                       | [8, 23, 35, 37] |
| 643290        | mowing lawn                                                  | 5.5                    | Ainsworth 08120 - mowing lawn, walk, power mower                    | [3]             |
| 633340        | picking flowers fruit or vegetables                          | 3.0                    | Ainsworth 08246 - picking fruit/vegetables                          | [3]             |
| <b>623320</b> | <b>pulling up weeds</b>                                      | <b>3.7</b>             | gardening measured in 1 child study, n = 63                         | [27]            |
| 641130        | putting away clothes                                         | 2.3                    | Ainsworth 05095 - putting away clothes, implied walking             | [3]             |
| 642170        | putting away or carrying groceries                           | 2.5                    | Ainsworth 05055 - putting away groceries                            | [3]             |
| 643310        | raking leaves                                                | 4.3                    | Ainsworth 08160 - raking lawn                                       | [3]             |
| 641180        | scrubbing floors in bathroom or bathtub                      | 3.8                    | Ainsworth 05130 - scrubbing floors                                  | [3]             |
| <b>640190</b> | <b>serving food</b>                                          | <b>2.6</b>             | setting table measured in 1 child study, n = 20                     | [39]            |
| <b>640350</b> | <b>setting the table</b>                                     | <b>2.6</b>             | setting table measured in 1 child study, n = 20                     | [39]            |
| 642200        | shopping                                                     | 2.3                    | Ainsworth 05060 - food shopping                                     | [3]             |
| <b>633390</b> | <b>shoveling/digging</b>                                     | <b>4.3</b>             | shoveling measured in 1 child study, n = 285                        | [8]             |

---

---

|                                                                                              |            |                                                                        |                 |
|----------------------------------------------------------------------------------------------|------------|------------------------------------------------------------------------|-----------------|
| <b>641210 sweeping floor</b>                                                                 | <b>3.6</b> | sweeping measured in 4 child studies, n = 378                          | [8, 23, 35, 37] |
| <b>643220 sweeping outside</b>                                                               | <b>3.6</b> | sweeping measured in 4 child studies, n = 378                          | [8, 23, 35, 37] |
| 641370 taking out the rubbish/garbage bin                                                    | 2.5        | Ainsworth 05030 - cleaning, light, carrying out trash                  | [3]             |
| <b>641230 tidying/cleaning room</b>                                                          | <b>3.4</b> | making bed and cleaning room measured in 2 child studies, n = 78       | [27, 39]        |
| 631240 unpacking boxes                                                                       | 3.5        | Ainsworth 05146 - standing - unpacking, packing boxes                  | [3]             |
| <b>641250 vacuuming</b>                                                                      | <b>4.2</b> | vacuuming measured in 3 child studies, n = 299                         | [8, 23, 29]     |
| 642260 washing car or windows                                                                | 3.0        | Ainsworth 05020 - cleaning, heavy, washing car or windows              | [3]             |
| <b>630270 washing or clearing dishes</b>                                                     | <b>1.9</b> | washing dishes measured in 2 child studies, n = 32                     | [29, 39]        |
| 643280 watering plants                                                                       | 2.5        | Ainsworth 05148 - watering plants                                      | [3]             |
| 643300 wheelbarrowing                                                                        | 5.0        | Ainsworth 08010 - loading/unloading or carrying lumber                 | [3]             |
| <b>OTHER</b>                                                                                 |            |                                                                        |                 |
| 721030 amusement/theme park rides                                                            | 1.5        | movement pattern similar to Ainsworth 09115 - watching sporting events | [3]             |
| 721000 camping – sitting                                                                     | 2.5        | Ainsworth 09110 - camping involving standing, walking, sitting         | [3]             |
| <b>722190 computer/playstation games</b>                                                     | <b>1.5</b> | playing video games sitting measured in 4 child studies, n = 426       | [8,23,36,41]    |
| <b>732200 playing active video games (e.g. EyeToy/dance mat/arcade games)</b>                |            |                                                                        |                 |
| <b>732201 playing active video games (e.g. EyeToy/dance mat/arcade games) - light effort</b> | <b>1.7</b> | playing video centre games measured in 2 child studies, n = 303        | [8, 33]         |

---

---

|               |                                                                                                  |                        |                                                                                                    |      |
|---------------|--------------------------------------------------------------------------------------------------|------------------------|----------------------------------------------------------------------------------------------------|------|
| <b>732202</b> | <b>playing active video games (e.g. EyeToy/dance mat/arcade games) - moderate effort</b>         | <b>3.4</b>             | playing moderate intensity video centre games (e.g. air hockey) measured in 1 child study, n = 10  | [41] |
| <b>732203</b> | <b>playing active video games (e.g. EyeToy/dance mat/arcade games) - hard effort</b>             | <b>6.4</b>             | playing high intensity video games (e.g. simulated horse racing) measured in 1 child study, n = 10 | [41] |
| 731210        | darts                                                                                            | 2.5                    | Ainsworth 15180 - darts, wall or lawn                                                              | [3]  |
| 721010        | family get-togethers (eat talk sit relax)                                                        | 1.5                    | Ainsworth 09000 - retreat/family reunion activities involving sitting, relaxing, talking, eating   | [3]  |
| 723020        | part time work - child care sitting (e.g. feeding/bathing)                                       | 2.5                    | Ainsworth 05185 – child care, general                                                              | [3]  |
| 733030        | part time work - child care standing (e.g. carrying/dressing/playing)                            | 3.0                    | Ainsworth 05186 – child care                                                                       | [3]  |
| <b>743020</b> | <b>part time work - door to door sales/delivery - paper rounds etc (long periods of walking)</b> | <b>2.9<sup>a</sup></b> | based on walking – light (see code 240051)                                                         |      |
| <b>743030</b> | <b>part time work - door to door sales/delivery - paper rounds etc (riding bike)</b>             | <b>4.7<sup>a</sup></b> | based on riding a bicycle – light (see code 341241)                                                |      |
| 733010        | part time work - serving standing (e.g. checkout/fast food)                                      | 2.3                    | Ainsworth 11600 – standing light (bartending, store clerk, etc)                                    | [3]  |
| 723010        | part time work - sitting office work                                                             | 1.5                    | Ainsworth 11580 – sitting, light office work                                                       | [3]  |
| 733020        | part time work - stacking shelves                                                                | 3.0                    | Ainsworth 11610 – standing; light/moderate (stocking)                                              | [3]  |
| 743010        | part time work - waitressing etc (short periods of walking)                                      | 2.0                    | Ainsworth 11791 – walking on job, very slow                                                        | [3]  |
| <b>741260</b> | <b>partying (mostly dancing)</b>                                                                 | <b>3.2<sup>a</sup></b> | based on 60% light dancing (4.1 METs) & 40% standing talking (1.8 METs).                           |      |
| 721240        | partying (mostly sitting)                                                                        | 1.5                    | Ainsworth 09055 - sitting talking, or talking on the phone                                         | [3]  |

---



---

|               |                                          |                        |                                                            |                         |
|---------------|------------------------------------------|------------------------|------------------------------------------------------------|-------------------------|
| 731250        | partying (mostly standing)               | 1.8                    | Ainsworth 09050 - standing talking or talking on the phone | [3]                     |
| 740150        | performing on stage at assembly          | 3.0                    | Ainsworth 11870 - theatre actor                            | [3]                     |
| <b>721220</b> | <b>playing cards/puzzles/board games</b> | <b>1.6</b>             | playing with puzzles measured in 3 child studies, n = 312  | [8, 23, 42]             |
| 720030        | playing the accordion                    | 1.8                    | Ainsworth 10010 - music playing, accordion                 | [3]                     |
| <b>720040</b> | <b>playing the cello</b>                 | <b>1.7</b>             | cello playing measured in 1 child study, n = 8             | [34]                    |
| 720050        | playing the drums                        | 4.0                    | Ainsworth 10040 - music playing, drums                     | [3]                     |
| 720060        | playing the flute/recorder - sitting     | 2.0                    | Ainsworth 10050 - music playing, flute (sitting)           | [3]                     |
| 720070        | playing the guitar - sitting             | 2.0                    | Ainsworth 10120 - music playing, guitar (sitting)          | [3]                     |
| 730080        | playing the guitar – standing            | 3.0                    | Ainsworth 10125 - music playing, guitar, standing          | [3]                     |
| 720090        | playing the horn                         | 2.0                    | Ainsworth 10060 - music playing, horn                      | [3]                     |
| <b>720100</b> | <b>playing the piano or organ</b>        | <b>1.7</b>             | playing the piano measured in 1 child study, n = 29        | [27]                    |
| 730110        | playing the trombone                     | 3.5                    | Ainsworth 10080 - music playing, trombone                  | [3]                     |
| 730120        | playing the trumpet                      | 2.5                    | Ainsworth 10090 - trumpet                                  | [3]                     |
| <b>720130</b> | <b>playing the violin</b>                | <b>1.7</b>             | violin playing measured in 2 child studies, n = 17         | [27, 34]                |
| 720140        | playing woodwind instruments             | 1.6                    | Ainsworth 10110 - music playing, woodwind instruments      | [3]                     |
| <b>721150</b> | <b>praying</b>                           | <b>1.4<sup>a</sup></b> | sitting quietly measured in 9 child studies, n = 288       | [19, 21, 22, 25, 27-31] |
| <b>720180</b> | <b>singing – sitting</b>                 | <b>1.4</b>             | singing, sitting measured in 1 child study, n = 15         | [38]                    |
| <b>730180</b> | <b>singing – standing</b>                | <b>1.6</b>             | singing, standing measured in 1 child study, n = 17        | [38]                    |

---

|                                      |            |                                                         |     |
|--------------------------------------|------------|---------------------------------------------------------|-----|
| <b>721160 sitting in church</b>      | <b>1.5</b> | Ainsworth 20005 - sitting in church, talking or singing | [3] |
| 721230 watching live sporting events | 1.5        | Ainsworth 09115 - watching sporting events              | [3] |
| 722170 wrapping/unwrapping presents  | 1.5        | Ainsworth 05080 - wrapping presents                     | [3] |

Note: MET = metabolic equivalent; TV = television; SEE = standard error of estimate; Adult = Adult compendium codes - code descriptions are not consistently presented in full. Some code descriptions have been edited to SI units and only relevant descriptions presented to conserve table space;

<sup>a</sup> = in some instances, the child specific energy cost for an activity with an identical movement pattern is used rather than an adult Ainsworth value with a more similar activity description;

<sup>b</sup> = walking and running energy costs based on a 12 year old child;

<sup>c</sup> = light, moderate and hard effort walking speeds based on speeds commonly reported in the Ridley and Olds energy cost review [9] and the customary slow, normal and fast walking speeds of 6-19 year olds reported by Waters and colleagues [16];

<sup>d</sup> = light, moderate and hard effort running speeds based on speeds commonly reported in the Ridley and Olds energy cost review [9].
