# Supplementary material for: Development of a Compendium of Energy Expenditures for Youth.
Source: Springer Nature journal article supplement (doi:10.1186/1479-5868-5-45), 2008-01-01
Supplement: Additional file 1 [file 1479-5868-5-45-s1.pdf]

Development of a Compendium of Energy Expenditures for Youth | International Journal of Behavioral Nutrition and Physical Activity | Full Text


xml version="1.0" encoding="UTF-8"?

Skip to main content

Advertisement

Search


- Explore journals
- Get published
- About BMC
- My account

Search all BMC articles

Search

International Journal of Behavioral Nutrition and Physical Activity

- Home
- About
- Articles
- Submission Guidelines
- Submit manuscript

Development of a Compendium of Energy Expenditures for Youth

Download PDF

Download ePub

Download PDF

Download ePub

- Methodology
- Open access
- Published: 10 September 2008

# Development of a Compendium of Energy Expenditures for Youth

- Kate Ridley1,
- Barbara E Ainsworth2 &
- Tim S Olds3

*International Journal of Behavioral Nutrition and Physical Activity*
**volume 5**, Article number: 45 (2008)
Cite this article

- 24k Accesses
- 431 Citations
- 9 Altmetric
- Metrics details

## Abstract

### Background

This paper presents a Compendium of Energy Expenditures for use in scoring physical activity questionnaires and estimating energy expenditure levels in youth.

### Method/Results

Modeled after the adult Compendium of Physical Activities, the Compendium of Energy Expenditures for Youth contains a list of over 200 activities commonly performed by youth and their associated MET intensity levels. A review of existing data collected on the energy cost of youth performing activities was undertaken and incorporated into the compendium. About 35% of the activity MET levels were derived from energy cost data measured in youth and the remaining MET levels estimated from the adult compendium.

### Conclusion

The Compendium of Energy Expenditures for Youth is useful to researchers and practitioners interested in identifying physical activity and energy expenditure values in children and adolescents in a variety of settings.

## Background

In order to effectively explore relationships between physical activity (PA) and health, issues of measurement are critical. Assessment of energy balance associated with obesity and other metabolic health conditions relies on precise measurement of both total energy expenditure (EE) and energy intake (EI). Moreover, when comparing children's activity levels to PA guidelines, time spent in various intensities of activity (e.g. moderate to vigorous physical activity; MVPA ≥ 3 METs) must be estimated [1]. Currently researchers are using a wide variety of instruments to assess PA and energy expenditure for studies of health-related behavior in youth. These measures include objective measures, such as accelerometry and pedometry; and subjective measures, such as observation, proxy-report and self-report questionnaires. However measuring PA and EE [both resting metabolic rate (RMR) and activity related EE] in youth is difficult, no matter what instrument is used, particularly when attempting to define levels of sedentary, moderate and vigorous activity [2]. Therefore, researchers are constantly seeking to refine and improve the precision of their measures.

Whether objective or subjective measures of PA are used, in many cases, researchers refer to compendia of energy costs to supplement the data acquired from these measures when estimating EE [3]. Compendia may be used to assign energy costs to observational data when estimating total EE or time spent in varying intensities of activity. Energy costs from compendia may be assigned to activities identified as having been performed when a pedometer or accelerometer was removed. Compendia have also been used to evaluate accelerometer cut-points by comparing accelerometer counts to estimated MET-min cost (one MET-min is the energy required to sustain resting metabolism for one minute) of various activities [4]. However, the most common use of compendia is to convert self-report data into EE [5]. While much work has been done on developing compendia of energy costs for adults [3, 6], there has been little research into the EE of youth performing everyday activities. The adult compendium contains only MET values measured in adults. While children's games are listed in the compendium, the energy cost is based on adults performing the games [7].

The use of adult data to assign energy costs to children's activities can be problematic. Energy cost per unit body weight tends to decrease as age increases [5, 7]. Hence, it is widely agreed that using adult mass-specific 


V
˙
O
2
MathType@MTEF@5@5@+=feaagaart1ev2aaatCvAUfKttLearuWrP9MDH5MBPbIqV92AaeXatLxBI9gBaebbnrfifHhDYfgasaacPC6xNi=xH8viVGI8Gi=hEeeu0xXdbba9frFj0xb9qqpG0dXdb9aspeI8k8fiI+fsY=rqGqVepae9pg0db9vqaiVgFr0xfr=xfr=xc9adbaqaaeGaciGaaiaabeqaaeqabiWaaaGcbaGafeOvayLbaiaacqqGpbWtdaWgaaWcbaGaeGOmaidabeaaaaa@2F54@
 data to assign energy costs to children and adolescents can result in substantial errors [3]. Two recent studies have investigated techniques used to assign energy costs to youth [8, 9]. Ridley and Olds [9] undertook a review of data published on the energy costs of everyday activities performed by children and adolescents. Briefly, the review [9] evaluated four existing methods for assigning EEs to children, i.e. using adult METs and methods recommended Torun [10], Sallis and colleagues [5] and the FAO/WHO/UNU [11]. A literature search was conducted to locate all English language studies that measured energy costs in healthy 6.0–17.9 year olds using criterion EE measures. Combined datasets were created for walking (1187 data points), running (1974 data points) and all remaining activities (51 activities, 5592 data points). Comparative analyses (paired t-test, Bland Altman and intra-class coefficients) were used to compare the assigned MET cost values to the MET values calculated from measured EE data. Analyses revealed that using adult METs was the most accurate assignment technique of the four compared [9]. However, as the MET cost of both walking and running was significantly influenced by age, it was recommended that prediction equations based on age and speed be used to estimated MET costs of walking and running in children, rather than using adult METs [9].

Harrell and colleagues [8] measured the energy cost of 18 physical activities in 8–18 year olds. Although both studies were limited by insufficient data, in terms of the range of activities performed and a lack of subject diversity, both concluded that using adult METs, combined with child-specific RMRs, is the best existing technique to assign EEs when measured values are not available [8, 9]. This recommendation suggests that although youth typically have higher RMRs than adults, resulting in a larger gross energy cost, the ratio of activity EE and resting EE appears to be similar in adults and youth [8, 9]. The review of the energy costs of children and adolescents performing everyday activities [9] provided sufficient data to compile a compendium that includes MET values measured in youth where available. The purpose of this paper is to describe the development of a compendium of energy costs for youth (ages 6.0–17.9 y) and to provide the compendium for use by other researchers.

## Methods

### The six-digit activity code

Each activity within the compendium is assigned an individual code, loosely based on the system used by Ainsworth and colleagues [6]. The code consists of six digits which provide information about the characteristics of each activity. A description of the code structure is shown in Table 1. The six digit activity code is organized as follows. From the left, the first digit refers to the type of activity (1 = sedentary, 2 = transport, 3 = play/sport, 4 = school work, 5 = self care, 6 = chores, and 7 = other). The second digit refers to the body position while performing the activity (0 = sleeping, 1 = lying down, etc.) The third digit provides the context for the activity and is specific to each activity category (e.g. sedentary category: 0 = not attending to anything, 1 = watching TV, etc). The fourth and fifth digits describe the specific activity performed, and the sixth digit describes a self-rating of effort, for those activities that can be performed at varying intensities (0 = no self-rating of effort required; 1 = light, 2 = moderate, 3 = hard).

**Table 1 The six-digit code used in the Compendium of Energy Expenditures for Youth.**

Full size table

An example of a coded activity for talking on the phone – sitting (124100) is as follows (Table 2) :

**Table 2**

Full size table

Each activity is also assigned a MET level that can be used to score physical activity intensity levels for estimation of EE.

### Developing a list of activities

There are 244 activities listed in the compendium. These activities were chosen by scanning the adult compendium for activities likely to be undertaken by children, reviewing activity lists within existing physical activity questionnaires and reviewing papers that describe common activities performed by children [3, 12]. The compendium for youth contains fewer activities than the adult compendium [3]. The adult compendium contains many activities that are not relevant for children and youth, e.g. occupational activities [3]. The youth compendium also contains fewer separate activity codes for variations in speed or intensity of movement. For example, 'walking' has over 30 variants in the adult compendium, including specifications such as variation in speed, terrain, etc; while the youth compendium only has six variants (i.e. walking – light effort; – moderate effort; – hard effort; and walking with a load – light effort; – moderate effort; – hard effort). It is unlikely that children can estimate their walking speed, thus the activity descriptions do not require that level of detail.

### Source of energy cost data

MET values were assigned to each activity based on the data located in the review of energy cost studies conducted by Ridley and Olds [9] and data sourced from the adult compendium. As the number of activities with measured child MET values is limited, a hierarchy of MET allocation techniques was used (outlined in Figure 1). The procedure involved evaluating whether activities had identical, or near identical, movement patterns to activities where energy costs had been measured in either children or were available in the adult compendium [3]. If the first allocation technique was not achievable due to a lack of data, the next technique was considered. Where data measured in youth were available from more than one study, a sample-weighted mean MET score was calculated [9]. Across the 244 activities, 35% of the MET values listed in the compendium were based on data measured in youth.

**Figure 1**

**Hierarchy of energy cost value allocation decisions used in the Compendium of Energy Expenditures for Youth.**

Full size image

### Effort levels

Many of the activities selected for the compendium can be performed at a wide range of effort levels or intensities, e.g. games and sports. As many self-report questionnaires ask participants to self-rate their level of effort [13], items for each of these effort levels (e.g. volleyball – hard) have been added to the compendium for selected activities. Activities classified as < 3 METs were rarely assigned light, moderate and hard effort values due to the probable lack of variability in energy cost while performing these activities. Data were available for some activities to assist assignment of the MET costs to the various effort levels. For instance, data collected while "shooting hoops" was used to assign the basketball – light effort MET cost, while data collected while playing a game of basketball were used to assign the basketball – moderate effort MET cost. However in many instances measured MET values were not available separately for light, moderate and hard efforts. In order to devise an appropriate weighting strategy to apply to the mean measured MET value, those activities in the adult compendium with various intensities were investigated. For many activities the 'light' MET value was 0.75 × the 'moderate' value and the 'hard' value was 1.25 × 'moderate' value. These weightings were then compared to energy cost values measured in youth collated in the Ridley and Olds' review [9]. In many of the youth studies the weighted values of 0.75 and 1.25 corresponded to (approximately) the mean value ± 1 SD. Therefore, where only one mean measured MET value was available for an activity that could be performed at various effort levels, the mean MET value was multiplied by 0.75 and 1.25 respectively to assign 'light' and 'hard' values. For example, the 'moderate' MET value assigned for hopscotch is 5.9 based on two studies in children [14, 15]. Based on the weighting strategy, the 'light' MET value for "hopscotch" was calculated as 4.4 (0.75 × 5.9) and the 'hard' MET value was calculated as 7.4 (1.25 × 5.9). While the decision to assign 'light' and 'hard' efforts for some activities by applying weightings of 0.75 and 1.25 was rather arbitrary, comparisons with existing data suggest this practice is reasonable given the lack of available data. As MET levels presented for each effort level are accompanied by a rationale for the calculation of the energy (see additional file 1: The Compendium of Energy Expenditures for Youth), researchers are able to make their own decisions, based on the characteristics of their data (e.g. availability of information regarding the amount of physical effort made while performing activities), whether to use the light- and vigorous-MET values allocated, or use the moderate value to assign the MET cost for all activities.

### Walking and running

Prediction equations were used to estimate walking and running MET costs. These equations were developed using level ground running and walking energy cost data from 40 studies collated in the Ridley and Olds review article [9]. The running MET prediction equation was based on 1974 data points: 0.27 age + 1.91 speed (m.s-1) + 0.46; r = 0.61, SEE = 1.38 METs. The walking MET prediction equation was based on 1187 data points: 0.07 age – 1.21 speed (m.s-1) + 1.65 speed2 (m.s-1) + 1.72; r = 0.65, SEE = 1.0 MET. As previously mentioned, it was decided not to present numerous walking MET costs for specific speeds. Therefore, typical light, medium and hard speeds were used to derive the MET costs at these subjective intensities. The speeds chosen for light, medium and hard effort walking (0.97 m.s-1, 1.25 m.s-1 and 1.53 m.s-1) and running (2.08 m.s-1, 2.50 m.s-1 and 2.92 m.s-1) were selected based on speeds commonly reported in the Ridley and Olds energy cost review [9] and the customary slow, normal and fast walking speeds of 6–19 year olds reported in Waters and colleagues' standard tables [16]. Researchers using the compendium may choose to use the typical light, medium and hard MET costs for a 12 year old child, or if age and walk/run speeds are available, calculate MET costs using the prediction equations with age and speed (m.s-1) as inputs.

### Calculation of energy cost

In many research designs it is appropriate to analyse energy cost data in METs, without converting to kcal or kJ. For example, the calculation of physical activity level (PAL, a time-weighted mean MET score) or time spent in MVPA for comparison between groups, or across instruments, can be obtained without converting MET scores to another measure of EE. However, when research designs require a calculation of total or gross EE (e.g. comparison of total EE across groups, comparison of EE and energy intake within individuals, etc.), MET values from the compendium need to be multiplied by child RMRs (either measured or estimated): kcal = MET value × child RMR (kcal.kg-1.min-1) × kg body weight × number of minutes activity performed. Common prediction equations for child RMRs include Schofield's age-, gender-, and mass-specific prediction equations [17] and Harrell's age-, gender- and pubertal status-specific equations [8]. For example, the gross EE for a 45 kg child with an estimated RMR of 0.025 kcal.kg-1.min-1 (estimated using Schofield's RMR equation [17]) performing 30 minutes of moderate basketball = 8.2 (MET) × 0.025 (RMR) × 45 (kg body wt) × 30 (minutes) = 276.75 kcal.

## Discussion and Limitations

The compendium was developed after a recent and extensive review of the published literature on the energy cost of activities in children and adolescents [9] and provides an up-to-date collation of currently available MET values for youth. In spite of this, due to a lack of energy cost studies, only 35% of the values listed in the compendium are based on data measured in youth, the rest are estimated from the adult compendium. The lack of data collected in youth is a limitation of the Compendium of Energy Expenditures for Youth. Nevertheless, evidence suggests that, on average, the magnitude of error is small when adult METs are used to estimate child MET costs and child RMRs are used as correction factors [9]. Moreover, despite the compendium replicating > 60% of its values from the adult compendium, the publication of a separate compendium of energy costs for youth is useful as it provides MET costs measured in youth where available and eliminates the need for researchers to locate and refer to numerous manuscripts to assign the most precise estimates of EE to their data. In addition, the youth compendium contains many activities commonly performed by children which are missing from the adult compendium (e.g. riding a scooter and playing playground games).

It is currently difficult, if not impossible; to eliminate error when assigning energy cost values to both adults and youth. As with many other measures of EE, the ability to precisely estimate EE using the compendium is limited. Both the adult and youth compendiums will more accurately estimate EE at a group level, rather than an individual level [18]. Many of the studies used to construct the compendium for youth had small sample sizes (e.g. < 20 subjects). A number were conducted many years ago and it is not clear whether the way children perform many activities, particularly leisure activities, has changed over the last few decades. Due to the high proportion of MET values sourced from the adult compendium, inherent limitations of the adult compendium may also be "passed on" to the youth compendium. A number of activities in the adult compendium were not directly measured, rather estimated based on the energy costs of other activities with similar movement patterns. Therefore the generalisability of the data in both the adult and youth compendiums may be questioned.

Using estimated mean MET values to assign energy costs to subjects is also problematic. In particular, activities that can be performed at varying intensities are most likely to have a wider variation in error of estimation. Not only are individuals able to perform the same activity at a range of intensities and varied level of mechanical efficiency, self-rated effort (or perceived level of intensity) can also impact on estimated EE. For example, two children could be performing the same physical activity, at the same rate of EE, yet one could rate the activity as of 'moderate' effort, while the other may perceive it as 'light'. Self-report instruments can be designed with features aimed at minimizing the extent of variation in self-rated effort [13]. Individuals may also vary in relation to weight status. While the use of METs to assign energy costs assumes the influence of body weight on energy cost is corrected for by applying a mass-specific RMR when estimating gross EE, it is unclear whether the MET costs of all activities, particular locomotor activities, are independent of body weight [19]. Therefore, some under- and over-estimation of energy cost related to the weight status of individuals may occur.

The limitations related to individual variation in movement, small sample sizes and paucity of data are not unique to the youth compendium. The adult compendium acknowledges the same limitations: "For activities in which the parameters are undefined, individual differences in EE can be large and the true energy cost for a person may or may not be close to the stated mean. This does not reduce the value of the standard intensity (MET) codes, but it is an important perspective from which to view the Compendium" [[6], pg. 73.]. Finally, the Compendium of Energy Expenditures for Youth is also not intended for use with children and adolescents who have disabilities that would significantly alter their movement patterns, mechanical efficiency and energy cost of activity.

## Conclusion

The Compendium of Energy Expenditures for Youth presented in the additional file 1 comprises 244 activities commonly performed by youth and associated MET costs. While the compendium will remain a work-in-progress with updated MET values being added to the compendium once data become available, the compendium provides the most up-to-date collation of energy costs for youth currently available. It is envisaged that the compendium will be of use to researchers investigating physical activity epidemiology in children and adolescents and will facilitate more accurate estimates of daily EE from subjective data.

## Notes

The authors have developed a database of energy cost data collected in children and adolescents to assist with future editions of the compendium. Researchers interested in sharing their unpublished or recently published data, or considering collecting energy cost data in the future, are encouraged to contact Dr. Kate Ridley for further information.

## Abbreviations

EE:
:   energy expenditure

EI:
:   energy intake

MET:
:   metabolic equivalent

MVPA:
:   moderate to vigorous physical activity

PA:
:   physical activity

PAL:
:   physical activity level

RMR:
:   resting metabolic rate

SEE:
:   standard error of estimate

TV:
:   television.

## References

1. Australia's Physical Activity Recommendations for Children and Young People. [http://www.health.gov.au/internet/main/publishing.nsf/Content/health-pubhlth-strateg-phys-act-guidelines]
2. Trost SG, Way R, Okely AD: Predictive validity of three ActiGraph energy expenditure equations for children. Medicine and Science in Sports and Exercise. 2006, 38: 380-387. 10.1249/01.mss.0000183848.25845.e0.

   Article 
   Google Scholar
3. Ainsworth BE, Haskell WL, Whitt MC, Irwin ML, Swartz AM, Strath SJ, O'Brien WL, Bassett DR, Schmitz KH, Emplaincourt PO, et al: Compendium of physical activities: an update of activity codes and MET intensities. Medicine and Science in Sports and Exercise. 2000, 32: s498-s516. 10.1097/00005768-200009001-00009.

   Article 
   CAS 
   Google Scholar
4. Ott AE, Pate RP, Trost SG, Ward DS, Saunders R: The use of uniaxial and triaxial accelerometers to measure children's "free-play" physical activity. Pediatric Exercise Science. 2000, 12: 360-370.

   Google Scholar
5. Sallis JF, Buono MJ, Freedson PS: Bias in estimating caloric expenditure from physical activity in children. Sports Medicine. 1991, 11: 203-209. 10.2165/00007256-199111040-00001.

   Article 
   CAS 
   Google Scholar
6. Ainsworth BE, Haskell WL, Leon AS, Jacobs DR, Montoye HJ, Sallis JF, Paffenbarger RS: Compendium of physical activities: classification of energy costs of human physical activities. Medicine and Science in Sports and Exercise. 1993, 25: 71-80. 10.1249/00005768-199301000-00011.

   Article 
   CAS 
   Google Scholar
7. Torun B: Inaccuracy of applying energy expenditure rates of adults to children. American Journal of Clinical Nutrition. 1983, 38: 813-814.

   CAS 
   Google Scholar
8. Harrell JS, McMurray RG, Baggett CD, Pennell ML, Pearce PF, Bangdiwala SI: Energy costs of physical activities in children and adolescents. Medicine and Science in Sports and Exercise. 2005, 37: 329-336. 10.1249/01.MSS.0000153115.33762.3F.

   Article 
   Google Scholar
9. Ridley K, Olds T: Assigning energy costs to activities in children: A review and synthesis. Med Sci Sports Exerc. 2008, 40 (8): 1439-1446.

   Article 
   Google Scholar
10. Torun B: Energy cost of various physical activities in healthy children. Activity, energy expenditure and energy requirements of infants and children. Edited by: Schurch B, Scrimshaw N. 1990, Lausanne: International Dietary Energy Consulting Group, 139-183.

    Google Scholar
11. FAO/WHO/UNU: Energy and protein requirements. 1985, Geneva: World Health Organization

    Google Scholar
12. Harrell JS, Gansky SA, Bradley CB, McMurray RG: Leisure time activities of elementary school children. Nursing Research. 1997, 46: 246-253. 10.1097/00006199-199709000-00002.

    Article 
    CAS 
    Google Scholar
13. Ridley K, Olds T, Hill A: The Multimedia activity recall for children and adolescents (MARCA): development and evaluation. Int J Behav Nutr Phys Act. 2006, 3 (10).
14. Eston R, Rowlands A, Ingledew D: Validity of heart rate, pedometry and accelerometry for predicting the energy cost of children's activities. Journal of Applied Physiology. 1998, 84: 362-371.

    CAS 
    Google Scholar
15. Louie L, Eston R, Rowlands A, Tong K, Ingledew D, Fu F: Validity of heart rate, pedometry, and accelerometry for estimating the energy cost of activity in Hong Kong Chinese boys. Pediatric Exercise Science. 1999, 11: 229-239.

    Google Scholar
16. Waters RL, Lunsford BR, Perry J, Byrd R: Energy-speed relationship of walking: standard tables. Journal of Orthopaedic Research. 1988, 6: 215-222. 10.1002/jor.1100060208.

    Article 
    CAS 
    Google Scholar
17. Schofield W: Predicting basal metabolic rate, new standards and review of previous work. Hum Nutr Clin Nutr. 1985, 39 (Suppl 1): 5-41.

    Google Scholar
18. Conway JM, Seale JL, Jacobs DR, Irwin ML, Ainsworth BE: Comparison of energy expenditure estimates from doubly labeled water, a physical activity questionnaire, and physical activity records. American Journal of Clinical Nutrition. 2002, 75: 519-525.

    CAS 
    Google Scholar
19. Spadano JL, Must A, Bandini LG, Dallal GE, Dietz WH: Energy cost of physical activities in 12-y-old girls: MET values and influence of body weight. International Journal of Obesity and Related Metabolic Disorders. 2003, 27: 1528-1553. 10.1038/sj.ijo.0802440.

    Article 
    CAS 
    Google Scholar
20. Taylor CM, Pye OF, Caldwell AB, Sostman ER: Energy expenditure of boys and girls 9 to 11 years of age (1) sitting listening to the radio (2) sitting singing, (3) standing singing. The Journal of Nutrition. 1949, 38: 1-10.

    CAS 
    Google Scholar
21. Banerjee B, Saha N: Energy intake and expenditure of Indian schoolboys. British Journal of Nutrition. 1972, 27: 483-498. 10.1079/BJN19720117.

    Article 
    CAS 
    Google Scholar
22. Banerjee B, Saha N: Energy cost of some common physical activities of Chinese schoolboys. Ann Nutr Metab. 1982, 26 (6): 360-366.

    Article 
    CAS 
    Google Scholar
23. Heil DP: Predicting activity energy expenditure using the actical activity monitor. Res Q Exerc Sport. 2006, 77 (1): 64-80.

    Article 
    Google Scholar
24. Klesges RC, Shelton ML, Klesges LM: Effects of television on metabolic rate: Potential implications for childhood obesity. Pediatrics. 1993, 91: 281-286.

    CAS 
    Google Scholar
25. Vermorel M, Vernet J, Bitar A, Fellmann N, Coudert J: Daily energy expenditure, activity patterns, and energy costs of the various activities in French 12–16-y-old adolescents in free living conditions. European Journal of Clinical Nutrition. 2002, 56: 819-829. 10.1038/sj.ejcn.1601395.

    Article 
    CAS 
    Google Scholar
26. Arvidsson D, Slinde F, Larsson S, Hulthen L: Energy cost of physical activities in children: Validation of SenseWear Armband. Med Sci Sports Exerc. 2007, 39 (11): 2076-2084.

    Article 
    Google Scholar
27. Bedale EM: Energy expenditure and food requirements of children at school. Proceedings of the Royal Society (London). 1923, 94: 368-404.

    Article 
    CAS 
    Google Scholar
28. Mahadeva K, Passmore R, Woolf B: Individual variations in the metabolic cost of standardised exercises: The effects of food, age, sex and race. The Journal of Physiology. 1953, 121: 225-231.

    Article 
    CAS 
    Google Scholar
29. Rieper H, Karst H, Noack R, Johnsen D: Intra- and inter-individual variations in energy expenditure of 14–15-year-old schoolgirls as determined by indirect calorimetry. British Journal of Nutrition. 1993, 69: 29-36. 10.1079/BJN19930006.

    Article 
    CAS 
    Google Scholar
30. Spady DW: Total daily energy expenditure of healthy, free ranging children. American Journal of Clinical Nutrition. 1980, 33: 766-775.

    CAS 
    Google Scholar
31. Spurr GB, Reina JC, Barac-Neito M: Marginal malnutrition in school-aged Colombian boys: metabolic rate and estimated daily energy expenditure. American Journal of Clinical Nutrition. 1986, 44: 113-126.

    CAS 
    Google Scholar
32. Merati G, Negrini S, Sarchi P, Mauro F, Veicsteinas A: Cardio-respiratory adjustments and cost of locomotion in school children during backpack walking (the Italian backpack study). European Journal of Applied Physiology. 2001, 85: 41-48. 10.1007/s004210100428.

    Article 
    CAS 
    Google Scholar
33. Cox L: Comparison of television viewing, arcade game play, and resting metabolic rates in youth. Masters dissertation. 1999, University of North Carolina, Department of Physical Education, Exercise and Sport Science

    Google Scholar
34. Horswill C, Kien C, Zipf W: Energy expenditure in adolescents during low intensity, leisure activities. Medicine and Science in Sports and Exercise. 1995, 27: 1311-1314.

    Article 
    CAS 
    Google Scholar
35. Pfeiffer K, Schmitz K, McMurray R, Treuth M, Murray D, Pate R: Physical activities in adolescent girls: variability in energy expenditure. American Journal of Preventive Medicine. 2006, 31: 328-331. 10.1016/j.amepre.2006.06.002.

    Article 
    Google Scholar
36. Treuth MS, Butte NF, Wong WW: Effects of familial predisposition to obesity on energy expenditure in multiethnic prepubertal girls. American Journal of Clinical Nutrition. 2000, 71: 893-900.

    CAS 
    Google Scholar
37. Eisenmann JC, Strath SJ, Shadrick D, Rigsby P, Hirsch N, Jacobson L: Validity of uniaxial accelerometry during activities of daily living in children. European Journal of Applied Physiology. 2004, 91: 259-263. 10.1007/s00421-003-0983-3.

    Article 
    Google Scholar
38. Taylor CM, Pye OF, Caldwell AB: Energy expenditure of 9 to 11 year-old boys and girls (1) standing drawing and (2) dressing and undressing. The Journal of Nutrition. 1948, 36: 123-131.

    CAS 
    Google Scholar
39. Ridley K: The Multimedia Activity Recall for Children and Adolescents (MARCA): Development and validation. PhD dissertation. 2005, University of South Australia, School of Health Sciences

    Google Scholar
40. Poujade B, Hautier CA, Rouard A: Determinants of the energy cost of front-crawl swimming in children. European Journal of Applied Physiology. 2002, 87: 1-6. 10.1007/s00421-001-0564-2.

    Article 
    CAS 
    Google Scholar
41. Ridley K, Olds T: Video center games: energy cost and children's behaviors. Pediatric Exercise Science. 2001, 13: 413-421.

    Google Scholar
42. Taylor CM, Lamb MW, Robertson ME, MacLeod G: Energy expenditure for quiet play and cycling of boys 7 to 14 years of age. Journal of Nutrition. 1948, 35: 511-521.

    CAS 
    Google Scholar

Download references

## Acknowledgements

Dr. Kate Ridley was supported by an Australian Postgraduate Award (APA) at the time of this project. The authors would like to thank Dr. Jim Dollman for his advice and assistance throughout the project.

## Author information

### Authors and Affiliations

1. Centre for the Analysis of Educational Futures, School of Education, Flinders University, Adelaide, Australia

   Kate Ridley
2. School of Applied Arts and Sciences, Department of Exercise and Wellness, Arizona State University, USA

   Barbara E Ainsworth
3. Sansom Institute, University of South Australia, Australia

   Tim S Olds

Authors

1. Kate Ridley

   View author publications

   You can also search for this author in
   PubMed Google Scholar
2. Barbara E Ainsworth

   View author publications

   You can also search for this author in
   PubMed Google Scholar
3. Tim S Olds

   View author publications

   You can also search for this author in
   PubMed Google Scholar

### Corresponding author

Correspondence to
Kate Ridley.

## Additional information

### Competing interests

The authors declare that they have no competing interests.

### Authors' contributions

KR conceived the study, collated the energy cost data and designed the compendium. KR drafted the manuscript and made revisions at every stage. TO assisted in the design of the compendium, advised on the interpretation of the data and provided input at each stage of the manuscript draft. BA is an author of the adult compendium which provides the basis for the youth compendium. BA provided advice on the interpretation of the data and provided input at each stage of the manuscript draft. All authors read and approved the final manuscript.

## Electronic supplementary material

### 12966\_2008\_189\_MOESM1\_ESM.pdf

Additional file 1: The Compendium of Energy Expenditures for Youth. Table of activity descriptors and energy expenditure values. (PDF 126 KB)

## Authors’ original submitted files for images

Below are the links to the authors’ original submitted files for images.

### Authors’ original file for figure 1

## Rights and permissions

This article is published under license to BioMed Central Ltd. This is an Open Access article distributed under the terms of the Creative Commons Attribution License (http://creativecommons.org/licenses/by/2.0), which permits unrestricted use, distribution, and reproduction in any medium, provided the original work is properly cited.

Reprints and permissions

## About this article

### Cite this article

Ridley, K., Ainsworth, B.E. & Olds, T.S. Development of a Compendium of Energy Expenditures for Youth.
*Int J Behav Nutr Phys Act* **5**, 45 (2008). https://doi.org/10.1186/1479-5868-5-45

Download citation

- Received: 16 May 2008
- Accepted: 10 September 2008
- Published: 10 September 2008
- DOI: https://doi.org/10.1186/1479-5868-5-45

### Share this article

Anyone you share the following link with will be able to read this content:

Get shareable link

Sorry, a shareable link is not currently available for this article.

Copy to clipboard

Provided by the Springer Nature SharedIt content-sharing initiative

### Keywords

- Energy Expenditure
- Energy Cost
- Rest Metabolic Rate
- Meet Level
- Hard Effort

Download PDF

Download ePub

Advertisement

#### International Journal of Behavioral Nutrition and Physical Activity

ISSN: 1479-5868

#### Contact us

- Submission enquiries: Access here and click Contact Us
- General enquiries: info@biomedcentral.com

- Read more on our blogs
- Receive BMC newsletters
- Manage article alerts
- Language editing for authors
- Scientific editing for authors

- Policies
- Accessibility
- Press center

- Support and Contact
- Leave feedback
- Careers

### Follow BMC

- BMC Twitter page
- BMC Facebook page
- BMC Weibo page

By using this website, you agree to our
Terms and Conditions,
Your US state privacy rights,
Privacy
statement and
Cookies policy.
Your privacy choices/Manage cookies we use in the preference centre.

© 2024 BioMed Central Ltd unless otherwise stated. Part of
Springer Nature.

xml version="1.0" encoding="UTF-8"?
